# Supplementary material for: False-negative errors in next-generation sequencing contribute substantially to inconsistency of mutation databases
Source: PLoS One. 2019 Sep 12;14(9):e0222535. doi: 10.1371/journal.pone.0222535 (PMC6742382; doi:10.1371/journal.pone.0222535)
Supplement: S2 Table — (XLSX) [file pone.0222535.s002.xlsx]

## Sheet: Sheet1
S2 Table. List of genes analyzed in targeted NGS
Gene	unavailable in GDSC or CCLE*
ABL1
ABL2
AKT1
AKT2
AKT3
ALK
APC
AR
ARAF
ATM
ATR
AURKA
AURKB
AURKC
AXL
BAP1
BCL2
BRAF
BRCA1
BRCA2
BRD2
BRD3
BRD4
CBFB
CCND1
CCND2
CCND3
CCNE1
CDH1
CDK12
CDK4
CDK6
CDKN1A
CDKN1B
CDKN2A
CDKN2B
CDKN2C
CEBPA
CHEK2
CREBBP
CRKL
CSF1R
CTNNB1
DDR1
DDR2
EGFR
EPHA3
ERBB2
ERBB3
ERBB4
ERCC2
ERG
ESR1
ETV1
ETV4
ETV5
ETV6
EWSR1
FBXW7
FGFR1
FGFR2
FGFR3
FGFR4
FLCN
FLT1
FLT3
FLT4
GNAQ
GNAS
HGF
HRAS
IDH1
IDH2
IGF1R
JAK1
JAK2
JAK3
KDR
KIT
KRAS
MAP2K1
MAP2K2
MAP2K4
MAP3K1
MAP3K4
MAPK1
MAPK3
MAPK8
MCL1
MDM2
MDM4
MEN1
MET
MITF
MLH1
MPL
MSH2
MSH6
MTOR
MYC
MYCN
MYD88
NF1
NF2
NFKBIA
NKX2-1
NOTCH1
NOTCH2
NOTCH3
NOTCH4
NPM1
NRAS
NTRK1
NTRK2
NTRK3
PDGFB
PDGFRA
PDGFRB
PIK3CA
PIK3CB
PIK3CD
PIK3R1
PIK3R2
PPARG
PTCH1
PTEN
RAD50
RAF1
RARA
RB1
RET
RHEB
RICTOR
ROS1
RUNX1
SMAD2
SMAD4
SMARCA4
SMARCB1
SMO
SRC
STK11
SYK
TET2
TMPRSS2
TOP2A
TP53
TSC1
TSC2
VHL
WT1
ASXL1	○
DNMT3A	○
DOT1L	○
ERRFI1	○
EZH2	○
FOXL2	○
GNA11	○
HDAC9	○
IGF2	○
KMT2A	○
MED12	○
NUTM1	○
POLE	○
RAB35	○
RNF43	○
RSPO1	○
RSPO2	○
XPO1	○
ZNRF3	○
*Mutation data in 19 genes (○) were not available in GDSC or CCLE, and further analysis only for 151 genes was performed.
