# Supplementary material for: False-negative errors in next-generation sequencing contribute substantially to inconsistency of mutation databases
Source: PLoS One. 2019 Sep 12;14(9):e0222535. doi: 10.1371/journal.pone.0222535 (PMC6742382; doi:10.1371/journal.pone.0222535)
Supplement: S3 Table — (XLSX) [file pone.0222535.s003.xlsx]

## Sheet: Sheet1
S3 Table. The basic information of the targeted sequencing with Axen Cancer Panel 2
Cell lines	Number of reads	On target reads	Sequenced bases	GC percentage	Mean coverage	Mean mapping quality
786-O	8,728,210	56.59%	463,863,969 bp	51.01%	997.21X	16.55
A498	8,107,161	57.73%	436,203,452 bp	50.59%	937.75X	16.55
A549	6,739,528	57.01%	358,743,806 bp	50.49%	771.25X	16.55
A549-2*	9,132,751	56.43%	484,193,049 bp	49.98%	1,040.95X	16.55
ACHN	8,101,131	58.26%	440,231,912 bp	50.43%	946.41X	16.55
BT-549	7,832,193	58.15%	426,457,384 bp	50.94%	916.8X	16.55
CALU6	7,795,122	55.58%	406,091,731 bp	50.92%	873.01X	16.55
CALU6-2*	7,240,932	55.76%	377,718,971 bp	50.84%	812.01X	16.55
COLO-205	7,706,368	59.14%	429,484,260 bp	50.65%	923.31X	16.55
DU145	7,273,736	59.06%	404,438,962 bp	50.77%	869.47X	16.55
HCT116	6,860,099	57.18%	365,386,504 bp	50.42%	785.52X	16.55
HCT116-2*	6,827,795	55.12%	354,296,926 bp	50.51%	761.66X	16.55
HCT15	7,807,532	57.27%	419,922,466 bp	50.37%	902.76X	16.55
Hs-578-T	10,516,191	60.2%	587,142,116 bp	50.51%	1,262.35X	16.54
HT29	8,554,689	61.16%	492,079,222 bp	50.43%	1,057.87X	16.55
HT29-2	8,566,562	60.9%	490,305,052 bp	50.4%	1,054.06X	16.55
IGROV-1	9,700,985	57.74%	520,054,137 bp	50.58%	1,118.03X	16.55
IGROV-1-2*	7,853,286	57.74%	421,921,392 bp	50.66%	907.06X	16.55
K562	8,334,830	40.93%	322,368,704 bp	50.71%	693.03X	16.41
KM-12	10,050,854	54.88%	521,370,116 bp	49.59%	1,120.85X	16.55
KM-12-2*	7,362,874	56.27%	389,786,991 bp	50.15%	837.97X	16.55
LOXIMVI	13,027,702	57.71%	700,750,899 bp	50.62%	1,506.59X	16.54
MCF7	8,379,161	57.27%	452,841,059 bp	50.74%	973.52X	16.55
MDA-MB-231	8,375,334	58.65%	463,876,771 bp	50.9%	997.24X	16.55
MDA-MB-468	7,297,002	56.84%	375,762,117 bp	50.52%	807.82X	16.55
NCI-H226	8,000,719	58.24%	435,246,235 bp	51.04%	935.69X	16.55
NCI-H23	7,853,032	59.57%	438,276,738 bp	50.08%	942.2X	16.55
NCI-H460	8,105,046	55.42%	420,967,827 bp	50.55%	904.99X	16.55
NCI-H460-2*	8,078,646	57.26%	433,225,664 bp	50.38%	931.36X	16.55
NCI-H522	12,109,378	58.2%	663,695,779 bp	50.34%	1,426.82X	16.55
OVCAR-3	7,618,951	59.26%	410,911,757 bp	50.45%	883.38X	16.55
OVCAR-4	8,177,639	59.28%	454,510,422 bp	50.47%	977.1X	16.55
OVCAR-8	8,985,361	54.27%	459,831,292 bp	49.84%	988.54X	16.55
OVCAR-8-2*	9,667,302	56.16%	509,569,329 bp	50.68%	1,095.47X	16.55
PC-3	15,107,295	54.47%	769,495,805 bp	51.36%	1,654.4X	16.55
RPMI-8226	8,208,190	58.27%	446,054,769 bp	50.48%	958.93X	16.55
SF-295	8,402,681	59.5%	465,303,997 bp	50.46%	1,000.31X	16.41
SK-MEL-5	7,769,924	55.99%	405,632,378 bp	49.79%	872.03X	16.55
SK-OV-3	10,417,593	58.74%	574,751,693 bp	50.59%	1,235.59X	16.55
SK-OV-3-2*	6,537,510	58.68%	362,682,672 bp	50.6%	779.69X	16.55
SW620	8,422,260	58.25%	460,936,988 bp	50.64%	990.92X	16.55
T47D	7,400,856	57.61%	402,795,259 bp	50.21%	865.94X	16.55
UACC257	7,963,687	60.88%	453,218,190 bp	50.87%	974.32X	16.55
UACC62	7,282,002	57.19%	386,433,736 bp	50.39%	830.76X	16.41
*"-2" was added after cell line name for TarSeq2 of which sequencing was performed separately from TarSeq1
