# Supplementary material for: False-negative errors in next-generation sequencing contribute substantially to inconsistency of mutation databases
Source: PLoS One. 2019 Sep 12;14(9):e0222535. doi: 10.1371/journal.pone.0222535 (PMC6742382; doi:10.1371/journal.pone.0222535)
Supplement: S6 Table — (XLSX) [file pone.0222535.s006.xlsx]

## Sheet: Sheet1
S6 Table. Mutations for 151 genes in 35 cancer cell lines
TarSeq	Positivity in Axen targeted sequencing positivity: 0, negatuve 1, positive
lowAF	mutations with AF less than 0.1 in Axen targeted sequencing
CCLE	positivity in CCLE: 0, negative 1, positive
GDSC	positivity in GDSC: 0, negative 1, positive
nGDSC	positivity in updated GDSC: 0, negative 1, positive
nCCLE	positivity in updated CCLE: 0, negative 1, positive
Count_Ref	Read count of reference allele in Axen targeted sequencing
Count_Alter	Read count of mutant allele in Axen targeted sequencing
AF	the ratio of Count_Alter and Count_Ref
Cell	Cell line
Hugo_Symbol	Gen name
chromosome	position	TarSeq	lowAF	CCLE	GDSC	uGDSC	uCCLE	Count_Ref	Count_Alter	AF	Cells	Hugo_Symbol	Entrez_Gene_Id	NCBI_Build	Chromosome	Start_position	End_position	Strand	Variant_Classification	Variant_Type	Reference_Allele	Tumor_Seq_Allele1	Tumor_Seq_Allele2	cDNA_Change	Codon_Change	Protein_Change
1	9776057	1		0	0	0	1	265	234	0.468938	HCT15	PIK3CD	5293	hg19	1	9776057	9776057	+	Missense_Mutation	SNP	C	C	T	c.521C>T	c.(520-522)tCg>tTg	p.S174L
1	9778780	1		0	0	0	0	265	142	0.348894	IGROV-1	PIK3CD	5293	hg19	1	9778780	9778780	+	Missense_Mutation	SNP	G	G	A	c.1049G>A	c.(1048-1050)gGc>gAc	p.G350D
1	9782031	1		1	1	1	1	179	203	0.531414	HCT116	PIK3CD	5293	hg19	1	9782031	9782031	+	Splice_Site	DEL	AG	AG	A		c.e17-1
1	11190689	1		1	0	0	1	195	330	0.628571	NCI-H522	MTOR	2475	hg19	1	11190689	11190689	+	Missense_Mutation	SNP	G	G	T	c.5510C>A	c.(5509-5511)aCt>aAt	p.T1837N
1	11190797	1		1	0	0	1	458	633	0.580202	NCI-H522	MTOR	2475	hg19	1	11190797	11190797	+	Missense_Mutation	SNP	A	A	C	c.5402T>G	c.(5401-5403)gTg>gGg	p.V1801G
1	11270947	1		1	1	1	1	533	261	0.328715	COLO-205	MTOR	2475	hg19	1	11270947	11270947	+	Missense_Mutation	SNP	G	G	A	c.3578C>T	c.(3577-3579)cCa>cTa	p.P1193L
1	43804305	1		0	0	0	0	637	615	0.491214	SW620	MPL	4352	hg19	1	43804305	43804305	+	Missense_Mutation	SNP	G	G	C	c.305G>C	c.(304-306)cGt>cCt	p.R102P
1	51436097	1		1	1	1	1	878	756	0.462668	IGROV-1	CDKN2C	1031	hg19	1	51436097	51436097	+	Missense_Mutation	SNP	G	G	T	c.57G>T	c.(55-57)gaG>gaT	p.E19D
1	65306997	1		1	1	1	1	0	1073	1	IGROV-1	JAK1	3716	hg19	1	65306997	65306997	+	Frame_Shift_Del	DEL	T	T	-	c.2580delA	c.(2578-2580)aaafs	p.K860fs
1	65306997	1		0	0	0	0	491	272	0.356488	KM-12	JAK1	3716	hg19	1	65306997	65306997	+	Frame_Shift_Del	DEL	T	T	-	c.2580delA	c.(2578-2580)aaafs	p.K860fs
1	65325833	1		0	0	0	0	1254	281	0.183062	IGROV-1	JAK1	3716	hg19	1	65325833	65325833	+	Frame_Shift_Del	DEL	G	G	-	c.1289delC	c.(1288-1290)ccgfs	p.P430fs
1	120458270	1		0	0	0	0	635	553	0.465488	786-O	NOTCH2	4853	hg19	1	120458270	120458270	+	Missense_Mutation	SNP	G	G	C	c.7075C>G	c.(7075-7077)Ccc>Gcc	p.P2359A
1	120458499	1		0	0	0	0	658	333	0.336024	SW620	NOTCH2	4853	hg19	1	120458499	120458499	+	Missense_Mutation	SNP	T	T	C	c.6846A>G	c.(6844-6846)atA>atG	p.I2282M
1	120459122	1		0	0	0	0	907	907	0.5	NCI-H226	NOTCH2	4853	hg19	1	120459122	120459122	+	Missense_Mutation	SNP	C	C	T	c.6223G>A	c.(6223-6225)Gtg>Atg	p.V2075M
1	120465364	1		0	0	0	0	591	571	0.491394	OVCAR-4	NOTCH2	4853	hg19	1	120465364	120465364	+	Missense_Mutation	SNP	C	C	T	c.4897G>A	c.(4897-4899)Gtt>Att	p.V1633I
1	120466308	1		1	1	1	1	700	722	0.507736	SK-OV-3	NOTCH2	4853	hg19	1	120466308	120466308	+	Frame_Shift_Del	DEL	CT	CT	-	c.4811delAG	c.(4810-4812)aagfs	p.K1604fs
1	120468201	1		0	0	0	0	2	683	0.99708	NCI-H460	NOTCH2	4853	hg19	1	120468201	120468201	+	Missense_Mutation	SNP	A	A	T	c.4238T>A	c.(4237-4239)cTc>cAc	p.L1413H
1	120479948	1		1	1	1	0	698	589	0.457653	IGROV-1	NOTCH2	4853	hg19	1	120479948	120479948	+	Missense_Mutation	SNP	T	T	C	c.3479A>G	c.(3478-3480)cAc>cGc	p.H1160R
1	120480571	1		0	1	1	1	524	448	0.460905	DU145	NOTCH2	4853	hg19	1	120480571	120480571	+	Frame_Shift_Ins	INS	-	-	T	c.3246_3246insA	c.(3244-3246)aaafs	p.K1082fs
1	120497754	1		1	1	1	1	699	696	0.498925	HCT15	NOTCH2	4853	hg19	1	120497754	120497754	+	Missense_Mutation	SNP	C	C	T	c.2128G>A	c.(2128-2130)Gag>Aag	p.E710K
1	120512148	1		1	0	0	1	188	151	0.445428	DU145	NOTCH2	4853	hg19	1	120512148	120512148	+	Missense_Mutation	SNP	G	G	A	c.1094C>T	c.(1093-1095)cCa>cTa	p.P365L
1	120548104	1		0	1	1	1	559	568	0.503993	HCT15	NOTCH2	4853	hg19	1	120548104	120548104	+	Missense_Mutation	SNP	G	G	A	c.263C>T	c.(262-264)gCc>gTc	p.A88V
1	120572563	1		0	1	1	1	17	9	0.346154	HCT116	NOTCH2	4853	hg19	1	120572563	120572563	+	Missense_Mutation	SNP	A	A	T	c.121T>A	c.(121-123)Tgt>Agt	p.C41S
1	120612014	1		0	0	0	0	159	64	0.286996	NCI-H460	NOTCH2	4853	hg19	1	120612014	120612014	+	Missense_Mutation	SNP	C	C	A	c.7G>T	c.(7-9)Gcc>Tcc	p.A3S
1	150551327	1		0	0	0	0	302	605	0.667034	LOXIMVI	MCL1	4170	hg19	1	150551327	150551327	+	Missense_Mutation	SNP	G	G	A	c.680C>T	c.(679-681)gCc>gTc	p.A227V
1	156843734	1		1	0	0	1	308	274	0.47079	UACC257	NTRK1	4914	hg19	1	156843734	156843734	+	Missense_Mutation	SNP	C	C	T	c.1160C>T	c.(1159-1161)cCc>cTc	p.P387L
1	156844704	1		0	1	1	1	1079	518	0.324358	LOXIMVI	NTRK1	4914	hg19	1	156844704	156844704	+	Missense_Mutation	SNP	G	G	A	c.1258G>A	c.(1258-1260)Gtg>Atg	p.V420M
1	156844708	1		1	1	1	1	626	612	0.494346	HCT15	NTRK1	4914	hg19	1	156844708	156844708	+	Missense_Mutation	SNP	C	C	T	c.1262C>T	c.(1261-1263)gCt>gTt	p.A421V
1	156848984	1		0	0	0	0	298	192	0.391837	HCT15	NTRK1	4914	hg19	1	156848984	156848984	+	Nonsense_Mutation	SNP	C	C	T	c.1876C>T	c.(1876-1878)Cag>Tag	p.Q626*
1	156849036	1		0	0	0	0	472	232	0.329545	KM-12	NTRK1	4914	hg19	1	156849036	156849036	+	Missense_Mutation	SNP	G	G	A	c.1928G>A	c.(1927-1929)gGt>gAt	p.G643D
1	156851382	1		0	0	0	0	290	278	0.489437	UACC62	NTRK1	4914	hg19	1	156851382	156851382	+	Missense_Mutation	SNP	G	G	A	c.2339G>A	c.(2338-2340)cGg>cAg	p.R780Q
1	162724529	1		1	1	1	1	3	632	0.995276	NCI-H23	DDR2	4921	hg19	1	162724529	162724529	+	Missense_Mutation	SNP	G	G	T	c.301G>T	c.(301-303)Ggg>Tgg	p.G101W
1	162724579	1		1	1	1	1	381	353	0.480926	HCT116	DDR2	4921	hg19	1	162724579	162724579	+	Missense_Mutation	SNP	G	G	A	c.351G>A	c.(349-351)atG>atA	p.M117I
1	162749939	1		1	1	1	0	742	695	0.483646	MDA-MB-468	DDR2	4921	hg19	1	162749939	162749939	+	Missense_Mutation	SNP	T	T	C	c.2471T>C	c.(2470-2472)gTg>gCg	p.V824A
1	179077415	1		0	0	0	0	359	739	0.673042	MDA-MB-231	ABL2	27	hg19	1	179077415	179077415	+	Missense_Mutation	SNP	G	G	C	c.2987C>G	c.(2986-2988)cCg>cGg	p.P996R
1	179077420	1		1	1	1	1	442	414	0.483645	HCT15	ABL2	27	hg19	1	179077420	179077420	+	Missense_Mutation	SNP	C	C	A	c.2982G>T	c.(2980-2982)caG>caT	p.Q994H
1	179077566	1		0	0	0	0	3	1053	0.997159	NCI-H23	ABL2	27	hg19	1	179077566	179077566	+	Missense_Mutation	SNP	C	C	T	c.2836G>A	c.(2836-2838)Gtg>Atg	p.V946M
1	179078041	1		1	1	1	1	1114	461	0.292698	DU145	ABL2	27	hg19	1	179078041	179078041	+	Missense_Mutation	SNP	C	C	T	c.2361G>A	c.(2359-2361)atG>atA	p.M787I
1	204499885	1		1	1	1	1	713	666	0.482959	HCT15	MDM4	4194	hg19	1	204499885	204499885	+	Missense_Mutation	SNP	G	G	A	c.227G>A	c.(226-228)tGt>tAt	p.C76Y
1	204515939	1		1	1	1	1	384	363	0.485944	HCT116	MDM4	4194	hg19	1	204515939	204515939	+	Frame_Shift_Del	DEL	A	A	-	c.837delA	c.(835-837)ggafs	p.G279fs
1	204515993	1		1	1	1	1	397	262	0.397572	KM-12	MDM4	4194	hg19	1	204515993	204515993	+	Missense_Mutation	SNP	G	G	T	c.891G>T	c.(889-891)gaG>gaT	p.E297D
1	243858956	1		1	1	1	1	413	153	0.270318	K562	AKT3	10000	hg19	1	243858956	243858956	+	Nonsense_Mutation	SNP	C	C	A	c.109G>T	c.(109-111)Gga>Tga	p.G37*
2	16082356	1		0	0	1	1	670	128	0.160401	HCT15	MYCN	4613	hg19	2	16082356	16082356	+	Missense_Mutation	SNP	C	C	A	c.170C>A	c.(169-171)cCc>cAc	p.P57H
2	29416133	1		0	0	0	0	632	200	0.240385	SW620	ALK	238	hg19	2	29416133	29416133	+	Missense_Mutation	SNP	G	G	A	c.4820C>T	c.(4819-4821)aCc>aTc	p.T1607I
2	29448419	1		0	0	0	0	773	260	0.251694	A498	ALK	238	hg19	2	29448419	29448419	+	Missense_Mutation	SNP	G	G	A	c.3080C>T	c.(3079-3081)cCg>cTg	p.P1027L
2	29455188	1		1	1	1	1	238	622	0.723256	A498	ALK	238	hg19	2	29455188	29455188	+	Missense_Mutation	SNP	C	C	T	c.2614G>A	c.(2614-2616)Ggc>Agc	p.G872S
2	29541220	1		0	1	1	1	739	748	0.503026	HCT15	ALK	238	hg19	2	29541220	29541220	+	Missense_Mutation	SNP	T	T	C	c.1597A>G	c.(1597-1599)Aca>Gca	p.T533A
2	30143246	1		0	0	0	0	152	138	0.475862	KM-12	ALK	238	hg19	2	30143246	30143246	+	Missense_Mutation	SNP	C	C	T	c.280G>A	c.(280-282)Gac>Aac	p.D94N
2	47641559	1		0	0	1	0	0	118	1	HCT116	MSH2	4436	hg19	2	47641559	47641559	+	Splice_Site	DEL	TAAAAAAAAAAAAAA	TAAAAAAAAAAAAAA	T		c.e5+2
2	47641559	1		0	0	0	0	1	124	0.992	IGROV-1	MSH2	4436	hg19	2	47641559	47641559	+	Splice_Site	DEL	TAAAAAAAAAAAAAA	TAAAAAAAAAAAAAA	T		c.e5+2
2	47641559	1		0	1	1	0	11	46	0.807018	KM-12	MSH2	4436	hg19	2	47641559	47641559	+	Splice_Site	DEL	TAAAAAAAAAAAAAAA	TAAAAAAAAAAAAAAA	T		c.e5+2
2	47643546	1		1	1	1	1	969	487	0.334478	NCI-H522	MSH2	4436	hg19	2	47643546	47643546	+	Missense_Mutation	SNP	G	G	C	c.1054G>C	c.(1054-1056)Gat>Cat	p.D352H
2	47703706	1		1	1	1	1	554	240	0.302267	DU145	MSH2	4436	hg19	2	47703706	47703706	+	Missense_Mutation	SNP	C	C	A	c.2206C>A	c.(2206-2208)Ctc>Atc	p.L736I
2	48025785	1		0	0	0	0	346	512	0.596737	SW620	MSH6	2956	hg19	2	48025785	48025785	+	Missense_Mutation	SNP	A	A	C	c.663A>C	c.(661-663)gaA>gaC	p.E221D
2	48025989	1		1	1	1	1	448	480	0.517241	HCT15	MSH6	2956	hg19	2	48025989	48025989	+	Frame_Shift_Del	DEL	C	C	-	c.867delC	c.(865-867)ggcfs	p.G289fs
2	48027196	1		0	0	0	0	1407	295	0.173325	IGROV-1	MSH6	2956	hg19	2	48027196	48027196	+	Frame_Shift_Del	DEL	A	A	-	c.2074delA	c.(2074-2076)aaafs	p.K693fs
2	48027301	1		0	1	1	1	464	440	0.486726	OVCAR-8	MSH6	2956	hg19	2	48027301	48027301	+	Missense_Mutation	SNP	A	A	T	c.2179A>T	c.(2179-2181)Acc>Tcc	p.T727S
2	48027755	1		0	0	0	0	466	868	0.650675	ACHN	MSH6	2956	hg19	2	48027755	48027755	+	Missense_Mutation	SNP	T	T	C	c.2633T>C	c.(2632-2634)gTt>gCt	p.V878A
2	48030586	1		1	1	1	1	269	532	0.66417	DU145	MSH6	2956	hg19	2	48030586	48030586	+	Missense_Mutation	SNP	G	G	T	c.3200G>T	c.(3199-3201)aGt>aTt	p.S1067I
2	48030640	1		0	1	1	1	539	219	0.288918	HCT116	MSH6	2956	hg19	2	48030640	48030640	+	Frame_Shift_Ins	INS	-	-	C	c.3254_3254insC	c.(3253-3255)accfs	p.T1085fs
2	48030640	1		1	0	0	0	1	1559	0.999359	IGROV-1	MSH6	2956	hg19	2	48030640	48030640	+	Frame_Shift_Del	DEL	C	C	-	c.3254delC	c.(3253-3255)accfs	p.T1085fs
2	48030640	1		0	1	1	1	500	69	0.121265	KM-12	MSH6	2956	hg19	2	48030640	48030640	+	Frame_Shift_Ins	INS	-	-	CC	c.3254_3254insCC	c.(3253-3255)accfs	p.T1085fs
2	48032121	1		0	1	1	1	657	631	0.489907	HCT15	MSH6	2956	hg19	2	48032121	48032121	+	Frame_Shift_Del	DEL	GA	GA	-	c.3511delGA	c.(3511-3513)gaafs	p.E1171fs
2	48032124	1		0	0	0	1	654	632	0.491446	HCT15	MSH6	2956	hg19	2	48032124	48032124	+	Frame_Shift_Del	DEL	AGA	AGA	-	c.3514delAGA	c.(3514-3516)agafs	p.R1172fs
2	48032766	1		1	0	0	1	191	124	0.393651	HCT15	MSH6	2956	hg19	2	48032766	48032766	+	Missense_Mutation	SNP	C	C	T	c.3566C>T	c.(3565-3567)aCa>aTa	p.T1189I
2	48033774	1		0	0	0	0	468	52	0.1	SK-OV-3	MSH6	2956	hg19	2	48033774	48033774	+	Missense_Mutation	SNP	T	T	C	c.3985T>C	c.(3985-3987)Tca>Cca	p.S1329P
2	209106786	1		1	1	1	1	376	297	0.441308	HCT116	IDH1	3417	hg19	2	209106786	209106786	+	Missense_Mutation	SNP	G	G	A	c.782C>T	c.(781-783)tCa>tTa	p.S261L
2	209113217	1		1	1	1	1	835	688	0.45174	HCT15	IDH1	3417	hg19	2	209113217	209113217	+	Missense_Mutation	SNP	C	C	T	c.290G>A	c.(289-291)gGc>gAc	p.G97D
2	212248542	1		1	1	1	1	1028	504	0.328982	MCF7	ERBB4	2066	hg19	2	212248542	212248542	+	Missense_Mutation	SNP	T	T	C	c.3725A>G	c.(3724-3726)tAc>tGc	p.Y1242C
2	212568865	1		1	1	1	1	72	302	0.807487	KM-12	ERBB4	2066	hg19	2	212568865	212568865	+	Frame_Shift_Ins	INS	-	-	A	c.1253_1253insT	c.(1252-1254)tctfs	p.S418fs
2	212576777	1		0	0	0	0	432	189	0.304348	HT29	ERBB4	2066	hg19	2	212576777	212576777	+	Missense_Mutation	SNP	A	A	C	c.1122T>G	c.(1120-1122)caT>caG	p.H374Q
2	212576794	1		1	0	0	1	375	393	0.511719	HCT15	ERBB4	2066	hg19	2	212576794	212576794	+	Missense_Mutation	SNP	G	G	T	c.1105C>A	c.(1105-1107)Cta>Ata	p.L369I
3	10183841	1		0	1	1	0	1	386	0.997416	786-O	VHL	7428	hg19	3	10183841	10183841	+	Frame_Shift_Del	DEL	G	G	-	c.310delG	c.(310-312)ggcfs	p.G104fs
3	10188283	1		1	1	1	1	0	968	1	A498	VHL	7428	hg19	3	10188283	10188283	+	Frame_Shift_Del	DEL	TGAC	TGAC	-	c.426delTGAC	c.(424-426)gttfs	p.V142fs
3	12475474	1		1	1	0	1	595	560	0.484848	HCT15	PPARG	5468	hg19	3	12475474	12475474	+	Missense_Mutation	SNP	A	A	C	c.1348A>C	c.(1348-1350)Aag>Cag	p.K450Q
3	37038108	1		1	1	1	1	4	437	0.99093	DU145	MLH1	4292	hg19	3	37038108	37038108	+	Splice_Site	SNP	A	A	T		c.e2-1
3	37045943	1		0	1	1	1	538	452	0.456566	HCT15	MLH1	4292	hg19	3	37045943	37045943	+	Missense_Mutation	SNP	G	G	T	c.358G>T	c.(358-360)Gct>Tct	p.A120S
3	37056000	1		1	0	1	1	0	532	1	HCT116	MLH1	4292	hg19	3	37056000	37056000	+	Nonsense_Mutation	SNP	C	C	A	c.755C>A	c.(754-756)tCa>tAa	p.S252*
3	37067468	1		1	1	1	0	0	576	1	786-O	MLH1	4292	hg19	3	37067468	37067468	+	Missense_Mutation	SNP	A	A	C	c.1379A>C	c.(1378-1380)gAg>gCg	p.E460A
3	37070378	1		1	1	1	1	4	1075	0.996293	IGROV-1	MLH1	4292	hg19	3	37070378	37070378	+	Frame_Shift_Del	DEL	A	A	-	c.1513delA	c.(1513-1515)agtfs	p.S505fs
3	37089035	1		1	1	1	1	361	338	0.483548	DU145	MLH1	4292	hg19	3	37089035	37089035	+	Missense_Mutation	SNP	C	C	T	c.1757C>T	c.(1756-1758)gCc>gTc	p.A586V
3	38180271	1		1	0	0	0	1	609	0.998361	NCI-H23	MYD88	4615	hg19	3	38180271	38180271	+	Missense_Mutation	SNP	T	T	C	c.119T>C	c.(118-120)aTg>aCg	p.M40T
3	38182077	1		1	1	1	1	302	216	0.416988	KM-12	MYD88	4615	hg19	3	38182077	38182077	+	Missense_Mutation	SNP	G	G	A	c.701G>A	c.(700-702)cGg>cAg	p.R234Q
3	38182637	1		1	1	1	1	595	648	0.521319	HCT15	MYD88	4615	hg19	3	38182637	38182637	+	Nonsense_Mutation	SNP	C	C	T	c.790C>T	c.(790-792)Cga>Tga	p.R264*
3	41266080	1		1	1	1	1	642	290	0.311159	OVCAR-8	CTNNB1	1499	hg19	3	41266080	41266080	+	Missense_Mutation	SNP	A	A	G	c.77A>G	c.(76-78)cAg>cGg	p.Q26R
3	41266134	1		1	1	1	1	467	429	0.478795	HCT116	CTNNB1	1499	hg19	3	41266134	41266134	+	Frame_Shift_Del	DEL	CTT	CTT	-	c.131delCTT	c.(130-132)cctfs	p.P44fs
3	41267276	1		0	0	0	0	0	323	1	COLO-205	CTNNB1	1499	hg19	3	41267276	41267276	+	Missense_Mutation	SNP	A	A	G	c.860A>G	c.(859-861)aAc>aGc	p.N287S
3	41267330	1		1	1	1	1	0	275	1	DU145	CTNNB1	1499	hg19	3	41267330	41267330	+	Missense_Mutation	SNP	C	C	G	c.914C>G	c.(913-915)gCt>gGt	p.A305G
3	52437611	1		1	0	0	1	474	448	0.4859	HCT15	BAP1	8314	hg19	3	52437611	52437611	+	Missense_Mutation	SNP	G	G	A	c.1550C>T	c.(1549-1551)aCg>aTg	p.T517M
3	89498451	1		1	1	1	1	743	1280	0.632724	LOXIMVI	EPHA3	2042	hg19	3	89498451	89498451	+	Nonsense_Mutation	SNP	G	G	A	c.2423G>A	c.(2422-2424)tGg>tAg	p.W808*
3	89499345	1		0	1	1	1	567	277	0.328199	MDA-MB-231	EPHA3	2042	hg19	3	89499345	89499345	+	Nonsense_Mutation	SNP	G	G	T	c.2515G>T	c.(2515-2517)Gag>Tag	p.E839*
3	138374244	1		1	1	1	1	378	723	0.656676	A498	PIK3CB	5291	hg19	3	138374244	138374244	+	Missense_Mutation	SNP	T	T	A	c.3200A>T	c.(3199-3201)gAc>gTc	p.D1067V
3	138403629	1		0	1	1	1	634	183	0.22399	OVCAR-4	PIK3CB	5291	hg19	3	138403629	138403629	+	Missense_Mutation	SNP	T	T	C	c.2153A>G	c.(2152-2154)aAg>aGg	p.K718R
3	138407797	1		1	1	1	1	470	235	0.333333	DU145	PIK3CB	5291	hg19	3	138407797	138407797	+	Missense_Mutation	SNP	C	C	T	c.2056G>A	c.(2056-2058)Gct>Act	p.A686T
3	138413637	1		0	0	0	1	438	318	0.420635	HCT15	PIK3CB	5291	hg19	3	138413637	138413637	+	Missense_Mutation	SNP	C	C	T	c.1883G>A	c.(1882-1884)cGa>cAa	p.R628Q
3	138413710	1		1	0	0	1	300	353	0.540582	IGROV-1	PIK3CB	5291	hg19	3	138413710	138413710	+	Frame_Shift_Del	DEL	G	G	-	c.1810delC	c.(1810-1812)cggfs	p.R604fs
3	138478043	1		1	1	1	1	312	618	0.664516	SK-MEL-5	PIK3CB	5291	hg19	3	138478043	138478043	+	Missense_Mutation	SNP	C	C	T	c.143G>A	c.(142-144)cGg>cAg	p.R48Q
3	142172028	1		0	0	0	0	764	334	0.304189	KM-12	ATR	545	hg19	3	142172028	142172028	+	Missense_Mutation	SNP	G	G	A	c.7703C>T	c.(7702-7704)cCa>cTa	p.P2568L
3	142178085	1		0	0	0	0	613	299	0.327851	KM-12	ATR	545	hg19	3	142178085	142178085	+	Missense_Mutation	SNP	G	G	A	c.7333C>T	c.(7333-7335)Cct>Tct	p.P2445S
3	142185191	1		0	0	0	0	728	414	0.362522	HCT15	ATR	545	hg19	3	142185191	142185191	+	Missense_Mutation	SNP	G	G	A	c.6872C>T	c.(6871-6873)gCc>gTc	p.A2291V
3	142217446	1		1	1	1	1	246	215	0.466377	HCT15	ATR	545	hg19	3	142217446	142217446	+	Missense_Mutation	SNP	T	T	C	c.5551A>G	c.(5551-5553)Att>Gtt	p.I1851V
3	142272241	1		1	1	1	1	230	125	0.352113	A549	ATR	545	hg19	3	142272241	142272241	+	Splice_Site	SNP	C	C	T		c.e13-1
3	142274740	1		0	0	0	0	633	205	0.24463	IGROV-1	ATR	545	hg19	3	142274740	142274740	+	Frame_Shift_Del	DEL	T	T	-	c.2320delA	c.(2320-2322)atafs	p.I774fs
3	142281750	1		0	0	0	0	942	422	0.309384	KM-12	ATR	545	hg19	3	142281750	142281750	+	Missense_Mutation	SNP	A	A	T	c.494T>A	c.(493-495)aTg>aAg	p.M165K
3	142284987	1		0	0	0	0	638	527	0.452361	HCT15	ATR	545	hg19	3	142284987	142284987	+	Missense_Mutation	SNP	G	G	A	c.268C>T	c.(268-270)Cat>Tat	p.H90Y
3	142286989	1		0	0	0	0	497	132	0.209857	HCT15	ATR	545	hg19	3	142286989	142286989	+	Missense_Mutation	SNP	G	G	A	c.67C>T	c.(67-69)Cca>Tca	p.P23S
3	178916725	1		1	1	1	1	421	656	0.609099	IGROV-1	PIK3CA	5290	hg19	3	178916725	178916725	+	Missense_Mutation	SNP	C	C	T	c.112C>T	c.(112-114)Cgt>Tgt	p.R38C
3	178928067	1		1	1	1	1	352	1061	0.750885	HT29	PIK3CA	5290	hg19	3	178928067	178928067	+	Missense_Mutation	SNP	C	C	A	c.1345C>A	c.(1345-1347)Cct>Act	p.P449T
3	178936091	1		1	1	1	1	169	182	0.518519	HCT15	PIK3CA	5290	hg19	3	178936091	178936091	+	Missense_Mutation	SNP	G	G	A	c.1633G>A	c.(1633-1635)Gag>Aag	p.E545K
3	178936091	1		1	1	1	1	148	196	0.569767	MCF7	PIK3CA	5290	hg19	3	178936091	178936091	+	Missense_Mutation	SNP	G	G	A	c.1633G>A	c.(1633-1635)Gag>Aag	p.E545K
3	178936091	1		1	1	1	1	194	176	0.475676	NCI-H460	PIK3CA	5290	hg19	3	178936091	178936091	+	Missense_Mutation	SNP	G	G	A	c.1633G>A	c.(1633-1635)Gag>Aag	p.E545K
3	178936103	1		1	1	1	1	167	185	0.525568	HCT15	PIK3CA	5290	hg19	3	178936103	178936103	+	Missense_Mutation	SNP	G	G	A	c.1645G>A	c.(1645-1647)Gat>Aat	p.D549N
3	178952085	1		1	1	1	1	361	300	0.453858	HCT116	PIK3CA	5290	hg19	3	178952085	178952085	+	Missense_Mutation	SNP	A	A	G	c.3140A>G	c.(3139-3141)cAt>cGt	p.H1047R
3	178952085	1		1	1	1	1	663	511	0.435264	SK-OV-3	PIK3CA	5290	hg19	3	178952085	178952085	+	Missense_Mutation	SNP	A	A	G	c.3140A>G	c.(3139-3141)cAt>cGt	p.H1047R
3	178952085	1		1	1	1	1	274	1313	0.827347	T47D	PIK3CA	5290	hg19	3	178952085	178952085	+	Missense_Mutation	SNP	A	A	G	c.3140A>G	c.(3139-3141)cAt>cGt	p.H1047R
3	178952152	1		1	1	1	1	142	267	0.652812	IGROV-1	PIK3CA	5290	hg19	3	178952152	178952152	+	Nonstop_Mutation	SNP	A	A	G	c.3207A>G	c.(3205-3207)tgA>tgG	p.*1069W
3	185774896	1		1	1	1	1	418	742	0.639655	DU145	ETV5	2119	hg19	3	185774896	185774896	+	Missense_Mutation	SNP	C	C	A	c.1177G>T	c.(1177-1179)Ggc>Tgc	p.G393C
3	185775260	1		1	1	1	1	326	282	0.463816	HCT15	ETV5	2119	hg19	3	185775260	185775260	+	Missense_Mutation	SNP	G	G	A	c.991C>T	c.(991-993)Ccc>Tcc	p.P331S
3	185797727	1		0	0	0	0	224	112	0.333333	MCF7	ETV5	2119	hg19	3	185797727	185797727	+	Missense_Mutation	SNP	C	C	T	c.529G>A	c.(529-531)Gcc>Acc	p.A177T
4	1805429	1		0	0	0	0	648	114	0.149606	HCT15	FGFR3	2261	hg19	4	1805429	1805429	+	Missense_Mutation	SNP	C	C	T	c.941C>T	c.(940-942)gCt>gTt	p.A314V
4	55129981	1		1	1	1	1	889	454	0.338049	MDA-MB-231	PDGFRA	5156	hg19	4	55129981	55129981	+	Missense_Mutation	SNP	A	A	T	c.515A>T	c.(514-516)tAc>tTc	p.Y172F
4	55131118	1		0	0	0	0	382	731	0.656783	OVCAR-8	PDGFRA	5156	hg19	4	55131118	55131118	+	Missense_Mutation	SNP	C	C	T	c.661C>T	c.(661-663)Ctt>Ttt	p.L221F
4	55131180	1		1	1	1	1	441	412	0.483001	DU145	PDGFRA	5156	hg19	4	55131180	55131180	+	Missense_Mutation	SNP	G	G	T	c.723G>T	c.(721-723)gaG>gaT	p.E241D
4	55131206	1		1	1	1	1	1152	334	0.224764	NCI-H23	PDGFRA	5156	hg19	4	55131206	55131206	+	Missense_Mutation	SNP	C	C	A	c.749C>A	c.(748-750)cCt>cAt	p.P250H
4	55138608	1		0	0	0	0	754	976	0.564162	IGROV-1	PDGFRA	5156	hg19	4	55138608	55138608	+	Missense_Mutation	SNP	G	G	A	c.1285G>A	c.(1285-1287)Ggg>Agg	p.G429R
4	55140793	1		1	1	1	1	438	193	0.305864	K562	PDGFRA	5156	hg19	4	55140793	55140793	+	Splice_Site	SNP	G	G	A		c.e11+1
4	55564516	1		1	1	1	1	625	590	0.485597	HCT15	KIT	3815	hg19	4	55564516	55564516	+	Missense_Mutation	SNP	G	G	A	c.404G>A	c.(403-405)cGc>cAc	p.R135H
4	55569954	1		0	0	0	0	571	570	0.499562	NCI-H522	KIT	3815	hg19	4	55569954	55569954	+	Missense_Mutation	SNP	C	C	A	c.821C>A	c.(820-822)aCg>aAg	p.T274K
4	55593437	1		0	0	0	0	843	826	0.494907	HCT15	KIT	3815	hg19	4	55593437	55593437	+	Missense_Mutation	SNP	G	G	A	c.1594G>A	c.(1594-1596)Gta>Ata	p.V532I
4	55946269	1		1	1	1	1	225	254	0.530271	NCI-H460	KDR	3791	hg19	4	55946269	55946269	+	Missense_Mutation	SNP	C	C	A	c.3910G>T	c.(3910-3912)Ggc>Tgc	p.G1304C
4	55961787	1		0	1	1	1	478	552	0.535922	HCT15	KDR	3791	hg19	4	55961787	55961787	+	Missense_Mutation	SNP	G	G	A	c.2774C>T	c.(2773-2775)tCc>tTc	p.S925F
4	55970899	1		1	1	1	1	632	419	0.398668	SK-MEL-5	KDR	3791	hg19	4	55970899	55970899	+	Missense_Mutation	SNP	G	G	A	c.1898C>T	c.(1897-1899)tCc>tTc	p.S633F
4	55973919	1		1	1	1	1	359	368	0.50619	DU145	KDR	3791	hg19	4	55973919	55973919	+	Missense_Mutation	SNP	C	C	A	c.1397G>T	c.(1396-1398)tGc>tTc	p.C466F
4	55976887	1		0	1	1	1	0	194	1	UACC257	KDR	3791	hg19	4	55976887	55976887	+	Missense_Mutation	SNP	G	G	A	c.1025C>T	c.(1024-1026)gCc>gTc	p.A342V
4	55981188	1		1	1	1	1	485	408	0.456887	IGROV-1	KDR	3791	hg19	4	55981188	55981188	+	Missense_Mutation	SNP	C	C	G	c.511G>C	c.(511-513)Gtt>Ctt	p.V171L
4	55987349	1		0	1	1	1	317	242	0.432916	KM-12	KDR	3791	hg19	4	55987349	55987349	+	Missense_Mutation	SNP	T	T	C	c.76A>G	c.(76-78)Agt>Ggt	p.S26G
4	106155779	1		1	0	0	1	485	428	0.468784	DU145	TET2	54790	hg19	4	106155779	106155779	+	Frame_Shift_Ins	INS	-	-	A	c.680_680insA	c.(679-681)gaafs	p.E227fs
4	106156529	1		1	1	1	1	337	610	0.644139	SK-MEL-5	TET2	54790	hg19	4	106156529	106156529	+	Missense_Mutation	SNP	C	C	T	c.1430C>T	c.(1429-1431)tCt>tTt	p.S477F
4	106157698	1		0	0	0	0	526	282	0.34901	SF-295	TET2	54790	hg19	4	106157698	106157698	+	Missense_Mutation	SNP	T	T	C	c.2599T>C	c.(2599-2601)Tat>Cat	p.Y867H
4	106196834	1		0	0	0	0	871	428	0.329484	SF-295	TET2	54790	hg19	4	106196834	106196834	+	Missense_Mutation	SNP	C	C	T	c.5167C>T	c.(5167-5169)Cct>Tct	p.P1723S
4	153247288	1		1	1	1	1	713	644	0.474576	SK-OV-3	FBXW7	55294	hg19	4	153247288	153247288	+	Missense_Mutation	SNP	C	C	A	c.1514G>T	c.(1513-1515)cGc>cTc	p.R505L
5	38944656	1		1	1	1	1	675	406	0.375578	SK-MEL-5	RICTOR	253260	hg19	5	38944656	38944656	+	Missense_Mutation	SNP	G	G	A	c.4805C>T	c.(4804-4806)cCa>cTa	p.P1602L
5	38945752	1		0	0	0	0	639	146	0.185987	HCT15	RICTOR	253260	hg19	5	38945752	38945752	+	Missense_Mutation	SNP	T	T	A	c.4474A>T	c.(4474-4476)Ata>Tta	p.I1492L
5	38950153	1		0	0	0	0	1146	532	0.317044	MDA-MB-468	RICTOR	253260	hg19	5	38950153	38950153	+	Missense_Mutation	SNP	G	G	T	c.3797C>A	c.(3796-3798)aCa>aAa	p.T1266K
5	38950729	1		0	0	0	0	1090	546	0.333741	LOXIMVI	RICTOR	253260	hg19	5	38950729	38950729	+	Missense_Mutation	SNP	T	T	C	c.3221A>G	c.(3220-3222)gAc>gGc	p.D1074G
5	38953603	1		1	1	1	1	272	328	0.546667	IGROV-1	RICTOR	253260	hg19	5	38953603	38953603	+	Nonsense_Mutation	SNP	C	C	T	c.2750G>A	c.(2749-2751)tGg>tAg	p.W917*
5	38953634	1		0	0	0	0	585	366	0.384858	Hs-578-T	RICTOR	253260	hg19	5	38953634	38953634	+	Missense_Mutation	SNP	G	G	A	c.2719C>T	c.(2719-2721)Cgt>Tgt	p.R907C
5	38958862	1		0	0	0	0	518	122	0.190625	SW620	RICTOR	253260	hg19	5	38958862	38958862	+	Nonsense_Mutation	SNP	C	C	T	c.2250G>A	c.(2248-2250)tgG>tgA	p.W750*
5	38959337	1		0	0	0	0	191	184	0.490667	HCT15	RICTOR	253260	hg19	5	38959337	38959337	+	Missense_Mutation	SNP	G	G	C	c.2138C>G	c.(2137-2139)gCt>gGt	p.A713G
5	38959392	1		0	0	0	0	273	140	0.338983	KM-12	RICTOR	253260	hg19	5	38959392	38959392	+	Missense_Mutation	SNP	C	C	T	c.2083G>A	c.(2083-2085)Gat>Aat	p.D695N
5	56160588	1		1	1	1	1	234	281	0.545631	IGROV-1	MAP3K1	4214	hg19	5	56160588	56160588	+	Nonsense_Mutation	SNP	C	C	T	c.862C>T	c.(862-864)Cga>Tga	p.R288*
5	56161182	1		1	1	1	1	485	417	0.462306	HCT116	MAP3K1	4214	hg19	5	56161182	56161182	+	Missense_Mutation	SNP	C	C	T	c.1051C>T	c.(1051-1053)Cgt>Tgt	p.R351C
5	56177018	1		0	0	0	0	1545	676	0.304367	NCI-H522	MAP3K1	4214	hg19	5	56177018	56177018	+	Missense_Mutation	SNP	G	G	T	c.2288G>T	c.(2287-2289)aGa>aTa	p.R763I
5	56177089	1		1	1	1	1	619	181	0.22625	SF-295	MAP3K1	4214	hg19	5	56177089	56177089	+	Missense_Mutation	SNP	G	G	A	c.2359G>A	c.(2359-2361)Gtt>Att	p.V787I
5	56189389	1		1	1	1	1	652	650	0.499232	HCT15	MAP3K1	4214	hg19	5	56189389	56189389	+	Missense_Mutation	SNP	C	C	A	c.4421C>A	c.(4420-4422)cCt>cAt	p.P1474H
5	67588105	1		1	1	1	1	467	482	0.507903	HCT15	PIK3R1	5295	hg19	5	67588105	67588105	+	Missense_Mutation	SNP	C	C	T	c.935C>T	c.(934-936)cCa>cTa	p.P312L
5	67589592	1		0	1	1	1	5	488	0.989858	Hs-578-T	PIK3R1	5295	hg19	5	67589592	67589592	+	In_Frame_Ins	INS	-	-	ATA	c.1355_1355insATA	c.(1354-1356)tat>tATAat	p.453_454insN
5	67591246	1		1	1	1	1	424	736	0.634483	OVCAR-3	PIK3R1	5295	hg19	5	67591246	67591246	+	Splice_Site	SNP	A	A	T		c.e14-1
5	112151204	1		0	0	0	0	659	164	0.199271	IGROV-1	APC	324	hg19	5	112151204	112151204	+	Nonsense_Mutation	SNP	C	C	T	c.847C>T	c.(847-849)Cga>Tga	p.R283*
5	112154948	1		1	1	1	1	594	578	0.493174	SK-MEL-5	APC	324	hg19	5	112154948	112154948	+	Missense_Mutation	SNP	C	C	T	c.1219C>T	c.(1219-1221)Ctt>Ttt	p.L407F
5	112162808	1		1	1	1	1	580	346	0.37365	KM-12	APC	324	hg19	5	112162808	112162808	+	Missense_Mutation	SNP	G	G	A	c.1412G>A	c.(1411-1413)gGa>gAa	p.G471E
5	112173471	1		1	1	1	1	741	629	0.459124	HCT15	APC	324	hg19	5	112173471	112173471	+	Missense_Mutation	SNP	G	G	T	c.2180G>T	c.(2179-2181)aGg>aTg	p.R727M
5	112173848	1		1	1	1	1	854	422	0.330721	HT29	APC	324	hg19	5	112173848	112173848	+	Nonsense_Mutation	SNP	G	G	T	c.2557G>T	c.(2557-2559)Gag>Tag	p.E853*
5	112174270	1		1	1	1	1	417	395	0.486453	HCT15	APC	324	hg19	5	112174270	112174270	+	Missense_Mutation	SNP	G	G	T	c.2979G>T	c.(2977-2979)aaG>aaT	p.K993N
5	112174822	1		1	1	1	1	543	514	0.486282	NCI-H226	APC	324	hg19	5	112174822	112174822	+	Missense_Mutation	SNP	T	T	G	c.3531T>G	c.(3529-3531)atT>atG	p.I1177M
5	112174964	1		0	1	1	1	852	254	0.229656	OVCAR-8	APC	324	hg19	5	112174964	112174964	+	Missense_Mutation	SNP	G	G	T	c.3673G>T	c.(3673-3675)Gcc>Tcc	p.A1225S
5	112175303	1		1	1	1	1	4	980	0.995935	SW620	APC	324	hg19	5	112175303	112175303	+	Nonsense_Mutation	SNP	C	C	T	c.4012C>T	c.(4012-4014)Cag>Tag	p.Q1338*
5	112175539	1		1	1	1	1	0	1266	1	HCT15	APC	324	hg19	5	112175539	112175539	+	Frame_Shift_Del	DEL	C	C	-	c.4248delC	c.(4246-4248)ggcfs	p.G1416fs
5	112175539	1		0	0	0	0	855	111	0.114907	KM-12	APC	324	hg19	5	112175539	112175539	+	Frame_Shift_Del	DEL	C	C	-	c.4248delC	c.(4246-4248)ggcfs	p.G1416fs
5	112175952	1		1	1	0	1	0	221	1	COLO-205	APC	324	hg19	5	112175952	112175952	+	Frame_Shift_Ins	INS	-	-	A	c.4661_4661insA	c.(4660-4662)gaafs	p.E1554fs
5	112175952	1		1	0	0	1	169	352	0.675624	HT29	APC	324	hg19	5	112175952	112175952	+	Frame_Shift_Ins	INS	-	-	A	c.4661_4661insA	c.(4660-4662)gaafs	p.E1554fs
5	112175952	1		0	1	1	1	626	192	0.234719	SK-OV-3	APC	324	hg19	5	112175952	112175952	+	Frame_Shift_Del	DEL	A	A	-	c.4661delA	c.(4660-4662)gaafs	p.E1554fs
5	112175970	1		0	0	0	0	762	146	0.160793	SK-OV-3	APC	324	hg19	5	112175970	112175970	+	Frame_Shift_Del	DEL	A	A	-	c.4679delA	c.(4678-4680)gaafs	p.E1560fs
5	112175974	1		1	1	1	1	265	310	0.53913	HCT15	APC	324	hg19	5	112175974	112175974	+	Missense_Mutation	SNP	G	G	T	c.4683G>T	c.(4681-4683)aaG>aaT	p.K1561N
5	112176628	1		0	1	1	1	436	72	0.141732	HCT15	APC	324	hg19	5	112176628	112176628	+	Missense_Mutation	SNP	A	A	G	c.5337A>G	c.(5335-5337)atA>atG	p.I1779M
5	112176740	1		1	1	1	1	348	351	0.502146	KM-12	APC	324	hg19	5	112176740	112176740	+	Frame_Shift_Ins	INS	-	-	A	c.5449_5449insA	c.(5449-5451)aaafs	p.K1817fs
5	112177787	1		1	1	1	1	265	223	0.456967	HCT15	APC	324	hg19	5	112177787	112177787	+	Nonsense_Mutation	SNP	C	C	T	c.6496C>T	c.(6496-6498)Cga>Tga	p.R2166*
5	112178972	1		0	0	0	0	832	231	0.21731	HCT15	APC	324	hg19	5	112178972	112178972	+	Missense_Mutation	SNP	G	G	T	c.7681G>T	c.(7681-7683)Gta>Tta	p.V2561L
5	112179236	1		0	0	0	0	721	365	0.336096	KM-12	APC	324	hg19	5	112179236	112179236	+	Missense_Mutation	SNP	C	C	T	c.7945C>T	c.(7945-7947)Cct>Tct	p.P2649S
5	131926990	1		1	1	1	1	585	192	0.247104	DU145	RAD50	10111	hg19	5	131926990	131926990	+	Missense_Mutation	SNP	T	T	A	c.1527T>A	c.(1525-1527)aaT>aaA	p.N509K
5	131931452	1		0	0	0	0	498	287	0.365605	DU145	RAD50	10111	hg19	5	131931452	131931452	+	Frame_Shift_Del	DEL	A	A	-	c.2157delA	c.(2155-2157)ctafs	p.L719fs
5	131931452	1		1	0	0	0	256	237	0.48073	HCT116	RAD50	10111	hg19	5	131931452	131931452	+	Frame_Shift_Del	DEL	A	A	-	c.2157delA	c.(2155-2157)ctafs	p.L719fs
5	131931452	1		1	0	0	0	311	426	0.578019	IGROV-1	RAD50	10111	hg19	5	131931452	131931452	+	Frame_Shift_Del	DEL	A	A	-	c.2157delA	c.(2155-2157)ctafs	p.L719fs
5	131931452	1		0	0	0	1	333	178	0.348337	KM-12	RAD50	10111	hg19	5	131931452	131931452	+	Frame_Shift_Ins	INS	-	-	A	c.2157_2157insA	c.(2158-2160)aaafs	p.K720fs
5	149433636	1		1	1	1	1	699	342	0.32853	LOXIMVI	CSF1R	1436	hg19	5	149433636	149433636	+	Missense_Mutation	SNP	C	C	T	c.2915G>A	c.(2914-2916)tGc>tAc	p.C972Y
5	149436930	1		0	0	0	0	246	248	0.502024	BT-549	CSF1R	1436	hg19	5	149436930	149436930	+	Missense_Mutation	SNP	C	C	T	c.2239G>A	c.(2239-2241)Gga>Aga	p.G747R
5	149457800	1		1	1	1	1	191	240	0.556845	NCI-H23	CSF1R	1436	hg19	5	149457800	149457800	+	Missense_Mutation	SNP	G	G	A	c.604C>T	c.(604-606)Ccc>Tcc	p.P202S
5	149457810	1		0	0	0	1	459	200	0.30349	CALU6	CSF1R	1436	hg19	5	149457810	149457810	+	Splice_Site	SNP	G	G	A	c.594C>T	c.(592-594)gtC>gtT	p.V198V
5	149460542	1		0	0	0	0	411	650	0.61263	NCI-H522	CSF1R	1436	hg19	5	149460542	149460542	+	Missense_Mutation	SNP	A	A	C	c.95T>G	c.(94-96)gTg>gGg	p.V32G
5	149495360	1		0	0	0	0	258	361	0.583199	UACC257	PDGFRB	5159	hg19	5	149495360	149495360	+	Missense_Mutation	SNP	G	G	A	c.3287C>T	c.(3286-3288)gCg>gTg	p.A1096V
5	149510153	1		0	1	1	1	742	349	0.31989	LOXIMVI	PDGFRB	5159	hg19	5	149510153	149510153	+	Missense_Mutation	SNP	C	C	T	c.1316G>A	c.(1315-1317)cGg>cAg	p.R439Q
5	149512407	1		0	0	0	0	745	332	0.308264	LOXIMVI	PDGFRB	5159	hg19	5	149512407	149512407	+	Missense_Mutation	SNP	G	G	A	c.1033C>T	c.(1033-1035)Ccg>Tcg	p.P345S
5	180030391	1		0	0	0	1	98	116	0.542056	HCT15	FLT4	2324	hg19	5	180030391	180030391	+	Splice_Site	SNP	C	C	T		c.e30-1
5	180035975	1		0	0	0	0	857	280	0.246262	MDA-MB-468	FLT4	2324	hg19	5	180035975	180035975	+	Missense_Mutation	SNP	C	C	T	c.3886G>A	c.(3886-3888)Ggc>Agc	p.G1296S
5	180043449	1		1	1	1	1	265	342	0.563427	HCT116	FLT4	2324	hg19	5	180043449	180043449	+	Missense_Mutation	SNP	G	G	A	c.3137C>T	c.(3136-3138)tCg>tTg	p.S1046L
5	180046071	1		0	0	0	1	139	79	0.362385	HCT15	FLT4	2324	hg19	5	180046071	180046071	+	Missense_Mutation	SNP	T	T	C	c.2800A>G	c.(2800-2802)Aac>Gac	p.N934D
5	180053023	1		0	0	0	1	230	396	0.632588	HCT116	FLT4	2324	hg19	5	180053023	180053023	+	Frame_Shift_Del	DEL	G	G	-	c.1267delC	c.(1267-1269)cagfs	p.Q423fs
5	180057100	1		1	0	1	1	237	217	0.477974	HCT15	FLT4	2324	hg19	5	180057100	180057100	+	Missense_Mutation	SNP	G	G	T	c.519C>A	c.(517-519)agC>agA	p.S173R
5	180057310	1		0	0	1	1	373	337	0.474648	HCT15	FLT4	2324	hg19	5	180057310	180057310	+	Missense_Mutation	SNP	G	G	T	c.428C>A	c.(427-429)cCt>cAt	p.P143H
5	180057624	1		1	1	1	1	834	1246	0.599038	OVCAR-4	FLT4	2324	hg19	5	180057624	180057624	+	Missense_Mutation	SNP	A	A	G	c.331T>C	c.(331-333)Tgc>Cgc	p.C111R
5	180057744	1		0	0	0	0	505	201	0.284703	MDA-MB-468	FLT4	2324	hg19	5	180057744	180057744	+	Missense_Mutation	SNP	C	C	T	c.211G>A	c.(211-213)Gga>Aga	p.G71R
6	30861150	1		0	0	0	1	307	241	0.439781	HCT15	DDR1	780	hg19	6	30861150	30861150	+	Missense_Mutation	SNP	A	A	G	c.1297A>G	c.(1297-1299)Atc>Gtc	p.I433V
6	32163225	1		0	0	0	0	247	181	0.422897	HCT15	NOTCH4	4855	hg19	6	32163225	32163225	+	Missense_Mutation	SNP	C	C	A	c.6001G>T	c.(6001-6003)Ggt>Tgt	p.G2001C
6	32165284	1		0	0	0	0	434	180	0.29316	SW620	NOTCH4	4855	hg19	6	32165284	32165284	+	Missense_Mutation	SNP	G	G	A	c.4844C>T	c.(4843-4845)cCc>cTc	p.P1615L
6	32168893	1		0	1	1	1	248	153	0.381546	MDA-MB-231	NOTCH4	4855	hg19	6	32168893	32168893	+	Splice_Site	SNP	C	C	A		c.e22+1
6	32171633	1		0	0	0	1	2	713	0.997203	NCI-H23	NOTCH4	4855	hg19	6	32171633	32171633	+	Missense_Mutation	SNP	G	G	T	c.3145C>A	c.(3145-3147)Ccc>Acc	p.P1049T
6	32180684	1		0	0	0	0	141	125	0.469925	A549	NOTCH4	4855	hg19	6	32180684	32180684	+	Missense_Mutation	SNP	A	A	C	c.2443T>G	c.(2443-2445)Tgt>Ggt	p.C815G
6	32945699	1		0	0	0	0	437	241	0.355457	DU145	BRD2	6046	hg19	6	32945699	32945699	+	Frame_Shift_Del	DEL	GAG	GAG	-	c.1495delGAG	c.(1495-1497)gagfs	p.E500fs
6	32945699	1		0	0	0	0	796	279	0.259535	OVCAR-8	BRD2	6046	hg19	6	32945699	32945699	+	Frame_Shift_Del	DEL	GAG	GAG	-	c.1495delGAG	c.(1495-1497)gagfs	p.E500fs
6	32946054	1		0	1	1	1	231	572	0.712329	DU145	BRD2	6046	hg19	6	32946054	32946054	+	Missense_Mutation	SNP	G	G	T	c.1730G>T	c.(1729-1731)aGg>aTg	p.R577M
6	36651934	1		0	0	1	1	389	343	0.468579	KM-12	CDKN1A	1026	hg19	6	36651934	36651934	+	Missense_Mutation	SNP	G	G	A	c.56G>A	c.(55-57)cGc>cAc	p.R19H
6	117686283	1		1	1	1	1	240	422	0.637462	UACC62	ROS1	6098	hg19	6	117686283	117686283	+	Missense_Mutation	SNP	G	G	A	c.3058C>T	c.(3058-3060)Cct>Tct	p.P1020S
6	117715410	1		1	1	1	1	360	172	0.323308	K562	ROS1	6098	hg19	6	117715410	117715410	+	Missense_Mutation	SNP	C	C	A	c.1079G>T	c.(1078-1080)aGa>aTa	p.R360I
6	117724379	1		0	0	0	0	210	367	0.636049	K562	ROS1	6098	hg19	6	117724379	117724379	+	Missense_Mutation	SNP	C	C	T	c.500G>A	c.(499-501)cGa>cAa	p.R167Q
6	117724379	1		0	0	0	0	725	585	0.446565	PC-3	ROS1	6098	hg19	6	117724379	117724379	+	Missense_Mutation	SNP	C	C	T	c.500G>A	c.(499-501)cGa>cAa	p.R167Q
6	117724379	1		0	0	0	0	735	634	0.463112	SK-OV-3	ROS1	6098	hg19	6	117724379	117724379	+	Missense_Mutation	SNP	C	C	T	c.500G>A	c.(499-501)cGa>cAa	p.R167Q
6	117724379	1		0	0	0	0	263	475	0.643631	UACC62	ROS1	6098	hg19	6	117724379	117724379	+	Missense_Mutation	SNP	C	C	T	c.500G>A	c.(499-501)cGa>cAa	p.R167Q
6	117724428	1		1	1	1	1	322	267	0.453311	HCT116	ROS1	6098	hg19	6	117724428	117724428	+	Missense_Mutation	SNP	G	G	A	c.451C>T	c.(451-453)Ccg>Tcg	p.P151S
6	117725466	1		1	1	1	1	657	540	0.451128	SK-OV-3	ROS1	6098	hg19	6	117725466	117725466	+	Missense_Mutation	SNP	G	G	C	c.415C>G	c.(415-417)Ctg>Gtg	p.L139V
6	161469776	1		0	1	1	1	416	266	0.390029	HCT116	MAP3K4	4216	hg19	6	161469776	161469776	+	Frame_Shift_Del	DEL	A	A	-	c.472delA	c.(472-474)aaafs	p.K159fs
6	161470754	1		0	1	1	1	578	621	0.517932	HCT15	MAP3K4	4216	hg19	6	161470754	161470754	+	Missense_Mutation	SNP	A	A	G	c.1450A>G	c.(1450-1452)Atc>Gtc	p.I484V
6	161507479	1		1	1	1	1	428	329	0.43461	HCT15	MAP3K4	4216	hg19	6	161507479	161507479	+	Missense_Mutation	SNP	A	A	G	c.2441A>G	c.(2440-2442)aAa>aGa	p.K814R
6	161519366	1		0	0	0	0	571	318	0.357705	HCT15	MAP3K4	4216	hg19	6	161519366	161519366	+	Frame_Shift_Del	DEL	C	C	-	c.3581delC	c.(3580-3582)gctfs	p.A1199fs
6	161519368	1		0	0	0	0	584	319	0.353267	HCT15	MAP3K4	4216	hg19	6	161519368	161519368	+	Frame_Shift_Del	DEL	GC	GC	-	c.3583delGC	c.(3583-3585)gccfs	p.A1199fs
6	161532914	1		1	0	0	1	701	590	0.45701	KM-12	MAP3K4	4216	hg19	6	161532914	161532914	+	Missense_Mutation	SNP	T	T	A	c.4443T>A	c.(4441-4443)gaT>gaA	p.D1481E
7	13971198	1		1	1	1	1	635	586	0.479934	HCT15	ETV1	2115	hg19	7	13971198	13971198	+	Missense_Mutation	SNP	C	C	T	c.731G>A	c.(730-732)aGt>aAt	p.S244N
7	55231511	1		0	1	1	1	224	677	0.751387	KM-12	EGFR	1956	hg19	7	55231511	55231511	+	Nonsense_Mutation	SNP	G	G	T	c.1717G>T	c.(1717-1719)Gga>Tga	p.G573*
7	55242482	1		1	1	1	1	1037	296	0.222056	RPMI-8226	EGFR	1956	hg19	7	55242482	55242482	+	Missense_Mutation	SNP	C	C	T	c.2252C>T	c.(2251-2253)aCa>aTa	p.T751I
7	81334827	1		1	1	1	1	257	459	0.641061	DU145	HGF	3082	hg19	7	81334827	81334827	+	Missense_Mutation	SNP	C	C	A	c.1889G>T	c.(1888-1890)cGa>cTa	p.R630L
7	81340797	1		1	1	1	1	94	30	0.241935	DU145	HGF	3082	hg19	7	81340797	81340797	+	Splice_Site	SNP	G	G	T	c.1444C>A	c.(1444-1446)Cat>Aat	p.H482N
7	92244486	1		0	0	0	0	641	273	0.298687	786-O	CDK6	1021	hg19	7	92244486	92244486	+	Missense_Mutation	SNP	T	T	A	c.949A>T	c.(949-951)Agc>Tgc	p.S317C
7	92404018	1		0	0	0	1	1094	246	0.183582	IGROV-1	CDK6	1021	hg19	7	92404018	92404018	+	Missense_Mutation	SNP	T	T	C	c.361A>G	c.(361-363)Acc>Gcc	p.T121A
7	92404051	1		0	0	0	0	395	654	0.623451	DU145	CDK6	1021	hg19	7	92404051	92404051	+	Missense_Mutation	SNP	C	C	T	c.328G>A	c.(328-330)Gat>Aat	p.D110N
7	116339642	1		0	0	0	0	446	810	0.644904	COLO-205	MET	4233	hg19	7	116339642	116339642	+	Missense_Mutation	SNP	G	G	T	c.504G>T	c.(502-504)gaG>gaT	p.E168D
7	116339848	1		1	1	1	1	705	758	0.518113	HCT116	MET	4233	hg19	7	116339848	116339848	+	Frame_Shift_Del	DEL	T	T	-	c.710delT	c.(709-711)gttfs	p.V237fs
7	116340135	1		1	1	1	1	712	306	0.300589	COLO-205	MET	4233	hg19	7	116340135	116340135	+	Missense_Mutation	SNP	A	A	T	c.997A>T	c.(997-999)Ata>Tta	p.I333L
7	116411990	1		0	0	0	0	740	1103	0.598481	ACHN	MET	4233	hg19	7	116411990	116411990	+	Missense_Mutation	SNP	C	C	T	c.3029C>T	c.(3028-3030)aCt>aTt	p.T1010I
7	116411990	1		0	0	0	0	806	676	0.45614	UACC257	MET	4233	hg19	7	116411990	116411990	+	Missense_Mutation	SNP	C	C	T	c.3029C>T	c.(3028-3030)aCt>aTt	p.T1010I
7	128845511	1		0	0	0	0	469	864	0.648162	A549	SMO	6608	hg19	7	128845511	128845511	+	Missense_Mutation	SNP	G	G	A	c.808G>A	c.(808-810)Gtc>Atc	p.V270I
7	128846374	1		1	1	1	1	427	405	0.486779	HCT116	SMO	6608	hg19	7	128846374	128846374	+	Missense_Mutation	SNP	G	G	A	c.1210G>A	c.(1210-1212)Gtg>Atg	p.V404M
7	128851498	1		1	1	1	1	357	459	0.5625	ACHN	SMO	6608	hg19	7	128851498	128851498	+	Missense_Mutation	SNP	A	A	G	c.1823A>G	c.(1822-1824)aAt>aGt	p.N608S
7	128851593	1		0	1	1	1	91	102	0.528497	HCT15	SMO	6608	hg19	7	128851593	128851593	+	Missense_Mutation	SNP	A	A	G	c.1918A>G	c.(1918-1920)Acc>Gcc	p.T640A
7	140453136	1		1	1	1	1	188	439	0.700159	COLO-205	BRAF	673	hg19	7	140453136	140453136	+	Missense_Mutation	SNP	A	A	T	c.1799T>A	c.(1798-1800)gTg>gAg	p.V600E
7	140453136	1		1	1	1	1	911	305	0.250822	HT29	BRAF	673	hg19	7	140453136	140453136	+	Missense_Mutation	SNP	A	A	T	c.1799T>A	c.(1798-1800)gTg>gAg	p.V600E
7	140453136	1		1	1	1	1	440	837	0.655442	LOXIMVI	BRAF	673	hg19	7	140453136	140453136	+	Missense_Mutation	SNP	A	A	T	c.1799T>A	c.(1798-1800)gTg>gAg	p.V600E
7	140453136	1		1	1	1	1	850	645	0.431438	SK-MEL-5	BRAF	673	hg19	7	140453136	140453136	+	Missense_Mutation	SNP	A	A	T	c.1799T>A	c.(1798-1800)gTg>gAg	p.V600E
7	140453136	1		1	1	1	1	585	547	0.483216	UACC257	BRAF	673	hg19	7	140453136	140453136	+	Missense_Mutation	SNP	A	A	T	c.1799T>A	c.(1798-1800)gTg>gAg	p.V600E
7	140453136	1		1	1	1	1	1	1006	0.999007	UACC62	BRAF	673	hg19	7	140453136	140453136	+	Missense_Mutation	SNP	A	A	T	c.1799T>A	c.(1798-1800)gTg>gAg	p.V600E
7	140481417	1		1	1	1	1	443	948	0.681524	MDA-MB-231	BRAF	673	hg19	7	140481417	140481417	+	Missense_Mutation	SNP	C	C	A	c.1391G>T	c.(1390-1392)gGa>gTa	p.G464V
7	140482927	1		0	0	0	1	606	166	0.215026	KM-12	BRAF	673	hg19	7	140482927	140482927	+	Frame_Shift_Ins	INS	-	-	G	c.1208_1208insC	c.(1207-1209)cctfs	p.P403fs
7	140507849	1		1	1	1	1	406	908	0.69102	LOXIMVI	BRAF	673	hg19	7	140507849	140507849	+	Missense_Mutation	SNP	T	T	C	c.622A>G	c.(622-624)Att>Gtt	p.I208V
7	140534557	1		1	1	1	1	445	1181	0.726322	HT29	BRAF	673	hg19	7	140534557	140534557	+	Missense_Mutation	SNP	G	G	C	c.356C>G	c.(355-357)aCc>aGc	p.T119S
7	140624426	1		0	0	0	0	1	47	0.979167	MDA-MB-468	BRAF	673	hg19	7	140624426	140624426	+	Missense_Mutation	SNP	C	C	A	c.78G>T	c.(76-78)gaG>gaT	p.E26D
7	151164257	1		1	1	1	1	570	555	0.493333	HCT15	RHEB	6009	hg19	7	151164257	151164257	+	Missense_Mutation	SNP	T	T	C	c.503A>G	c.(502-504)gAa>gGa	p.E168G
7	151188035	1		1	1	1	1	202	179	0.469816	HCT15	RHEB	6009	hg19	7	151188035	151188035	+	Missense_Mutation	SNP	C	C	T	c.118G>A	c.(118-120)Gaa>Aaa	p.E40K
8	38277252	1		0	0	1	1	475	225	0.321429	DU145	FGFR1	2260	hg19	8	38277252	38277252	+	Splice_Site	SNP	G	G	T	c.816C>A	c.(814-816)gcC>gcA	p.A272A
8	38282161	1		1	0	1	1	695	626	0.473883	HCT15	FGFR1	2260	hg19	8	38282161	38282161	+	Missense_Mutation	SNP	C	C	A	c.529G>T	c.(529-531)Gcc>Tcc	p.A177S
9	5064974	1		1	1	1	1	431	498	0.53606	HCT15	JAK2	3717	hg19	9	5064974	5064974	+	Missense_Mutation	SNP	T	T	C	c.1148T>C	c.(1147-1149)cTc>cCc	p.L383P
9	5126343	1		0	0	0	0	10	1400	0.992908	OVCAR-3	JAK2	3717	hg19	9	5126343	5126343	+	Missense_Mutation	SNP	G	G	A	c.3188G>A	c.(3187-3189)cGt>cAt	p.R1063H
9	21971108	1		0	1	1	1	0	469	1	DU145	CDKN2A	1029	hg19	9	21971108	21971108	+	Missense_Mutation	SNP	C	C	A	c.250G>T	c.(250-252)Gac>Tac	p.D84Y
9	21971116	1		0	1	1	1	1	456	0.997812	UACC257	CDKN2A	1029	hg19	9	21971116	21971116	+	Missense_Mutation	SNP	G	G	A	c.242C>T	c.(241-243)cCc>cTc	p.P81L
9	21974759	1		0	0	0	1	161	178	0.525074	HCT116	CDKN2A	1029	hg19	9	21974759	21974759	+	Frame_Shift_Ins	INS	-	-	C	c.68_68insG	c.(67-69)ggtfs	p.G23fs
9	21994234	1		0	0	0	1	159	189	0.543103	HCT116	CDKN2A	1029	hg19	9	21994234	21994234	+	Frame_Shift_Del	DEL	C	C	-	c.97delG	c.(97-99)gagfs	p.E33fs
9	21994393	1		1	0	0	1	0	257	1	OVCAR-4	CDKN2A	1029	hg19	9	21994393	21994393	+	Missense_Mutation	SNP	A	A	T	c.61T>A	c.(61-63)Tca>Aca	p.S21T
9	37002659	1		0	0	0	0	1	3	0.75	DU145	PAX5	5079	hg19	9	37002659	37002659	+	Missense_Mutation	SNP	C	C	T	c.590G>A	c.(589-591)cGc>cAc	p.R197H
9	80430643	1		0	0	0	0	413	248	0.375189	RPMI-8226	GNAQ	2776	hg19	9	80430643	80430643	+	Missense_Mutation	SNP	G	G	C	c.365C>G	c.(364-366)tCt>tGt	p.S122C
9	80646042	1		0	0	1	1	167	123	0.424138	HCT116	GNAQ	2776	hg19	9	80646042	80646042	+	Missense_Mutation	SNP	C	C	T	c.110G>A	c.(109-111)cGc>cAc	p.R37H
9	87325677	1		1	1	1	1	452	539	0.543895	SK-MEL-5	NTRK2	4915	hg19	9	87325677	87325677	+	Missense_Mutation	SNP	C	C	T	c.554C>T	c.(553-555)cCc>cTc	p.P185L
9	87338511	1		0	0	0	0	290	491	0.628681	COLO-205	NTRK2	4915	hg19	9	87338511	87338511	+	Missense_Mutation	SNP	G	G	A	c.607G>A	c.(607-609)Gca>Aca	p.A203T
9	87563409	1		1	0	0	1	967	473	0.328472	DU145	NTRK2	4915	hg19	9	87563409	87563409	+	Missense_Mutation	SNP	G	G	T	c.1749G>T	c.(1747-1749)aaG>aaT	p.K583N
9	93606343	1		0	0	0	0	754	350	0.317029	KM-12	SYK	6850	hg19	9	93606343	93606343	+	Missense_Mutation	SNP	G	G	A	c.163G>A	c.(163-165)Gtg>Atg	p.V55M
9	93636560	1		1	1	1	1	621	424	0.405742	KM-12	SYK	6850	hg19	9	93636560	93636560	+	Missense_Mutation	SNP	G	G	T	c.990G>T	c.(988-990)tgG>tgT	p.W330C
9	93637007	1		1	1	1	1	384	337	0.467406	HCT15	SYK	6850	hg19	9	93637007	93637007	+	Missense_Mutation	SNP	G	G	A	c.1057G>A	c.(1057-1059)Gcg>Acg	p.A353T
9	93641212	1		0	0	1	0	498	465	0.482866	A498	SYK	6850	hg19	9	93641212	93641212	+	Missense_Mutation	SNP	C	C	A	c.1558C>A	c.(1558-1560)Cgt>Agt	p.R520S
9	93657839	1		1	1	1	1	561	926	0.62273	DU145	SYK	6850	hg19	9	93657839	93657839	+	Missense_Mutation	SNP	T	T	C	c.1865T>C	c.(1864-1866)gTg>gCg	p.V622A
9	98209617	1		0	0	0	0	590	142	0.193989	IGROV-1	PTCH1	5727	hg19	9	98209617	98209617	+	Frame_Shift_Del	DEL	G	G	-	c.3921delC	c.(3919-3921)cccfs	p.P1307fs
9	98209617	1		0	1	1	1	232	107	0.315634	KM-12	PTCH1	5727	hg19	9	98209617	98209617	+	Frame_Shift_Del	DEL	G	G	-	c.3921delC	c.(3919-3921)cccfs	p.P1307fs
9	98209693	1		0	0	0	0	36	51	0.586207	MDA-MB-468	PTCH1	5727	hg19	9	98209693	98209693	+	Missense_Mutation	SNP	G	G	A	c.3845C>T	c.(3844-3846)cCg>cTg	p.P1282L
9	98211547	1		0	0	0	0	413	142	0.255856	HCT15	PTCH1	5727	hg19	9	98211547	98211547	+	Missense_Mutation	SNP	C	C	T	c.3608G>A	c.(3607-3609)aGc>aAc	p.S1203N
9	98244480	1		0	0	0	0	371	177	0.322993	HCT15	PTCH1	5727	hg19	9	98244480	98244480	+	Missense_Mutation	SNP	C	C	A	c.590G>T	c.(589-591)tGg>tTg	p.W197L
9	98278959	1		1	0	0	1	7	312	0.978056	RPMI-8226	PTCH1	5727	hg19	9	98278959	98278959	+	In_Frame_Ins	INS	-	-	TTC	c.144_144insGAA	c.(142-144)gaa>gaGAAa	p.48_49insK
9	98278972	1		0	0	0	0	184	202	0.523316	MDA-MB-468	PTCH1	5727	hg19	9	98278972	98278972	+	Missense_Mutation	SNP	T	T	C	c.131A>G	c.(130-132)gAa>gGa	p.E44G
9	98278975	1		0	1	1	1	275	227	0.452191	HCT15	PTCH1	5727	hg19	9	98278975	98278975	+	Missense_Mutation	SNP	C	C	T	c.128G>A	c.(127-129)gGa>gAa	p.G43E
9	133738370	1		0	1	1	1	330	278	0.457237	HCT116	ABL1	25	hg19	9	133738370	133738370	+	Missense_Mutation	SNP	A	A	G	c.770A>G	c.(769-771)tAc>tGc	p.Y257C
9	133755543	1		0	0	0	0	642	536	0.455008	SK-OV-3	ABL1	25	hg19	9	133755543	133755543	+	Splice_Site	SNP	C	C	T	c.1512C>T	c.(1510-1512)gaC>gaT	p.D504D
9	133760024	1		1	0	1	1	516	251	0.327249	IGROV-1	ABL1	25	hg19	9	133760024	133760024	+	Frame_Shift_Del	DEL	C	C	-	c.2347delC	c.(2347-2349)cccfs	p.P784fs
9	133760106	1		0	0	0	0	142	327	0.697228	HT29	ABL1	25	hg19	9	133760106	133760106	+	Missense_Mutation	SNP	C	C	T	c.2429C>T	c.(2428-2430)cCg>cTg	p.P810L
9	133760528	1		0	1	1	1	152	497	0.765794	UACC257	ABL1	25	hg19	9	133760528	133760528	+	Missense_Mutation	SNP	C	C	T	c.2851C>T	c.(2851-2853)Ccg>Tcg	p.P951S
9	133760529	1		0	1	1	1	153	499	0.765337	UACC257	ABL1	25	hg19	9	133760529	133760529	+	Missense_Mutation	SNP	C	C	T	c.2852C>T	c.(2851-2853)cCg>cTg	p.P951L
9	135772017	1		0	1	1	1	264	496	0.652632	DU145	TSC1	7248	hg19	9	135772017	135772017	+	Missense_Mutation	SNP	C	C	A	c.3100G>T	c.(3100-3102)Ggt>Tgt	p.G1034C
9	135772814	1		0	0	0	0	651	168	0.205128	HCT15	TSC1	7248	hg19	9	135772814	135772814	+	Missense_Mutation	SNP	C	C	T	c.2809G>A	c.(2809-2811)Gca>Aca	p.A937T
9	135797261	1		1	1	1	1	611	443	0.420304	KM-12	TSC1	7248	hg19	9	135797261	135797261	+	Frame_Shift_Del	DEL	A	A	-	c.608delT	c.(607-609)ttgfs	p.L203fs
9	136899904	1		1	1	1	1	349	504	0.590856	SK-MEL-5	BRD3	8019	hg19	9	136899904	136899904	+	Nonsense_Mutation	SNP	G	G	A	c.1984C>T	c.(1984-1986)Cag>Tag	p.Q662*
9	136905272	1		1	0	0	0	0	244	1	A549	BRD3	8019	hg19	9	136905272	136905272	+	Frame_Shift_Del	DEL	CTC	CTC	-	c.1527delGAG	c.(1525-1527)gagfs	p.E509fs
9	136913396	1		1	1	1	1	264	297	0.529412	HCT15	BRD3	8019	hg19	9	136913396	136913396	+	Missense_Mutation	SNP	G	G	A	c.895C>T	c.(895-897)Ccc>Tcc	p.P299S
9	136913458	1		1	0	0	1	262	307	0.539543	HCT15	BRD3	8019	hg19	9	136913458	136913458	+	Missense_Mutation	SNP	C	C	T	c.833G>A	c.(832-834)cGg>cAg	p.R278Q
9	136916738	1		1	1	1	1	530	232	0.304462	HT29	BRD3	8019	hg19	9	136916738	136916738	+	Missense_Mutation	SNP	G	G	C	c.445C>G	c.(445-447)Ccc>Gcc	p.P149A
9	136918387	1		0	0	0	0	245	66	0.212219	KM-12	BRD3	8019	hg19	9	136918387	136918387	+	Splice_Site	SNP	C	C	A	c.213G>T	c.(211-213)ccG>ccT	p.P71P
9	136918529	1		1	0	0	0	71	81	0.532895	HCT116	BRD3	8019	hg19	9	136918529	136918529	+	Frame_Shift_Del	DEL	G	G	-	c.71delC	c.(70-72)ccgfs	p.P24fs
9	136918529	1		1	0	0	0	74	168	0.694215	IGROV-1	BRD3	8019	hg19	9	136918529	136918529	+	Frame_Shift_Del	DEL	G	G	-	c.71delC	c.(70-72)ccgfs	p.P24fs
9	136918572	1		0	1	1	1	74	35	0.321101	DU145	BRD3	8019	hg19	9	136918572	136918572	+	Missense_Mutation	SNP	C	C	T	c.28G>A	c.(28-30)Gcg>Acg	p.A10T
9	139391079	1		0	1	1	1	588	373	0.388137	RPMI-8226	NOTCH1	4851	hg19	9	139391079	139391079	+	Missense_Mutation	SNP	G	G	C	c.7112C>G	c.(7111-7113)aCc>aGc	p.T2371S
9	139391422	1		0	0	0	1	213	208	0.494062	HCT15	NOTCH1	4851	hg19	9	139391422	139391422	+	Missense_Mutation	SNP	C	C	T	c.6769G>A	c.(6769-6771)Gcg>Acg	p.A2257T
9	139395290	1		1	0	0	1	116	115	0.497835	NCI-H23	NOTCH1	4851	hg19	9	139395290	139395290	+	Missense_Mutation	SNP	G	G	A	c.5648C>T	c.(5647-5649)aCc>aTc	p.T1883I
9	139399401	1		0	0	0	1	253	257	0.503922	HCT15	NOTCH1	4851	hg19	9	139399401	139399401	+	Missense_Mutation	SNP	G	G	A	c.4742C>T	c.(4741-4743)cCg>cTg	p.P1581L
9	139399891	1		1	1	1	1	1013	339	0.25074	OVCAR-8	NOTCH1	4851	hg19	9	139399891	139399891	+	Missense_Mutation	SNP	G	G	A	c.4457C>T	c.(4456-4458)cCc>cTc	p.P1486L
9	139400212	1		0	0	0	0	652	144	0.180905	IGROV-1	NOTCH1	4851	hg19	9	139400212	139400212	+	Frame_Shift_Del	DEL	G	G	-	c.4136delC	c.(4135-4137)acgfs	p.T1379fs
9	139401817	1		0	1	1	1	375	333	0.470339	HCT116	NOTCH1	4851	hg19	9	139401817	139401817	+	Missense_Mutation	SNP	C	C	T	c.3583G>A	c.(3583-3585)Ggg>Agg	p.G1195R
9	139403450	1		0	0	0	0	306	45	0.128205	HCT15	NOTCH1	4851	hg19	9	139403450	139403450	+	Missense_Mutation	SNP	C	C	A	c.3043G>T	c.(3043-3045)Ggc>Tgc	p.G1015C
9	139404410	1		0	0	0	1	249	246	0.49697	HCT116	NOTCH1	4851	hg19	9	139404410	139404410	+	Missense_Mutation	SNP	G	G	A	c.2744C>T	c.(2743-2745)cCg>cTg	p.P915L
9	139412288	1		0	0	0	0	1320	405	0.234783	PC-3	NOTCH1	4851	hg19	9	139412288	139412288	+	Missense_Mutation	SNP	C	C	T	c.1357G>A	c.(1357-1359)Gtc>Atc	p.V453I
9	139412632	1		1	0	0	1	551	500	0.475737	IGROV-1	NOTCH1	4851	hg19	9	139412632	139412632	+	Frame_Shift_Del	DEL	GTACCC	GTACCC	-	c.1212delGGGTAC	c.(1210-1212)tagfs	p.*404fs
9	139413165	1		1	1	1	1	759	318	0.295265	K562	NOTCH1	4851	hg19	9	139413165	139413165	+	Missense_Mutation	SNP	C	C	A	c.977G>T	c.(976-978)gGc>gTc	p.G326V
9	139418228	1		0	0	0	1	234	244	0.51046	HCT116	NOTCH1	4851	hg19	9	139418228	139418228	+	Frame_Shift_Del	DEL	C	C	-	c.344delG	c.(343-345)ggcfs	p.G115fs
10	43596063	1		1	0	0	1	0	558	1	NCI-H23	RET	5979	hg19	10	43596063	43596063	+	Missense_Mutation	SNP	G	G	T	c.230G>T	c.(229-231)cGc>cTc	p.R77L
10	43600616	1		0	1	1	1	778	460	0.371567	NCI-H522	RET	5979	hg19	10	43600616	43600616	+	Missense_Mutation	SNP	C	C	T	c.842C>T	c.(841-843)gCc>gTc	p.A281V
10	43612131	1		1	1	1	1	285	561	0.663121	DU145	RET	5979	hg19	10	43612131	43612131	+	Missense_Mutation	SNP	C	C	A	c.2236C>A	c.(2236-2238)Ctg>Atg	p.L746M
10	43612143	1		1	1	1	1	521	446	0.46122	IGROV-1	RET	5979	hg19	10	43612143	43612143	+	Missense_Mutation	SNP	G	G	A	c.2248G>A	c.(2248-2250)Gca>Aca	p.A750T
10	43614996	1		0	1	1	0	31	15	0.326087	DU145	RET	5979	hg19	10	43614996	43614996	+	Missense_Mutation	SNP	G	G	A	c.2410G>A	c.(2410-2412)Gtg>Atg	p.V804M
10	43619256	1		1	1	1	1	250	259	0.508841	HCT15	RET	5979	hg19	10	43619256	43619256	+	Splice_Site	SNP	T	T	C	c.2939T>C	c.(2938-2940)aTg>aCg	p.M980T
10	89690847	1		1	1	1	1	1	520	0.998081	MDA-MB-468	PTEN	5728	hg19	10	89690847	89690847	+	Splice_Site	SNP	G	G	T		c.e4+1
10	89692901	1		1	1	1	1	723	506	0.411717	KM-12	PTEN	5728	hg19	10	89692901	89692901	+	Nonsense_Mutation	SNP	G	G	T	c.385G>T	c.(385-387)Gga>Tga	p.G129*
10	89692961	1		1	1	1	1	0	834	1	786-O	PTEN	5728	hg19	10	89692961	89692961	+	Nonsense_Mutation	SNP	C	C	T	c.445C>T	c.(445-447)Caa>Taa	p.Q149*
10	89692980	1		1	1	1	1	563	487	0.46381	IGROV-1	PTEN	5728	hg19	10	89692980	89692980	+	Missense_Mutation	SNP	A	A	G	c.464A>G	c.(463-465)tAt>tGt	p.Y155C
10	89717672	1		1	1	1	1	2	841	0.997628	SF-295	PTEN	5728	hg19	10	89717672	89717672	+	Nonsense_Mutation	SNP	C	C	T	c.697C>T	c.(697-699)Cga>Tga	p.R233*
10	89717715	1		1	1	1	1	2	565	0.996473	UACC62	PTEN	5728	hg19	10	89717715	89717715	+	Frame_Shift_Ins	INS	-	-	A	c.740_740insA	c.(739-741)ttafs	p.L247fs
10	89717770	1		1	1	1	1	378	312	0.452174	KM-12	PTEN	5728	hg19	10	89717770	89717770	+	Frame_Shift_Del	DEL	A	A	-	c.795delA	c.(793-795)ctafs	p.L265fs
10	89720670	1		0	1	1	1	0	117	1	BT-549	PTEN	5728	hg19	10	89720670	89720670	+	Frame_Shift_Del	DEL	G	G	-	c.821delG	c.(820-822)tggfs	p.W274fs
10	89720799	1		1	1	1	1	443	439	0.497732	IGROV-1	PTEN	5728	hg19	10	89720799	89720799	+	Frame_Shift_Del	DEL	TACT	TACT	-	c.950delTACT	c.(949-951)gtafs	p.V317fs
10	123256164	1		1	1	1	1	764	287	0.273073	HCT116	FGFR2	2263	hg19	10	123256164	123256164	+	Missense_Mutation	SNP	G	G	A	c.1745C>T	c.(1744-1746)cCc>cTc	p.P582L
10	123256233	1		0	0	0	1	434	80	0.155642	SK-OV-3	FGFR2	2263	hg19	10	123256233	123256233	+	Missense_Mutation	SNP	G	G	T	c.1676C>A	c.(1675-1677)cCt>cAt	p.P559H
10	123276934	1		0	1	1	1	0	684	1	NCI-H23	FGFR2	2263	hg19	10	123276934	123276934	+	Missense_Mutation	SNP	T	T	G	c.983A>C	c.(982-984)tAt>tCt	p.Y328S
10	123310883	1		0	0	0	0	773	338	0.30423	HCT15	FGFR2	2263	hg19	10	123310883	123310883	+	Missense_Mutation	SNP	C	C	G	c.545G>C	c.(544-546)gGg>gCg	p.G182A
11	534288	1		0	1	1	1	383	423	0.524814	Hs-578-T	HRAS	3265	hg19	11	534288	534288	+	Missense_Mutation	SNP	C	C	T	c.35G>A	c.(34-36)gGc>gAc	p.G12D
11	32413608	1		0	0	0	0	383	78	0.169197	HCT15	WT1	7490	hg19	11	32413608	32413608	+	Missense_Mutation	SNP	C	C	T	c.706G>A	c.(706-708)Gtg>Atg	p.V236M
11	32438043	1		1	1	1	1	0	191	1	DU145	WT1	7490	hg19	11	32438043	32438043	+	Missense_Mutation	SNP	G	G	C	c.358C>G	c.(358-360)Cag>Gag	p.Q120E
11	32456280	1		0	1	1	1	3	364	0.991826	DU145	WT1	7490	hg19	11	32456280	32456280	+	Missense_Mutation	SNP	G	G	T	c.612C>A	c.(610-612)agC>agA	p.S204R
11	69462905	1		1	1	1	1	449	153	0.254153	LOXIMVI	CCND1	595	hg19	11	69462905	69462905	+	Missense_Mutation	SNP	G	G	C	c.718G>C	c.(718-720)Gac>Cac	p.D240H
11	108115541	1		1	1	1	1	514	277	0.35019	OVCAR-4	ATM	472	hg19	11	108115541	108115541	+	Missense_Mutation	SNP	A	A	C	c.689A>C	c.(688-690)aAt>aCt	p.N230T
11	108115595	1		1	1	1	1	877	526	0.374911	IGROV-1	ATM	472	hg19	11	108115595	108115595	+	Missense_Mutation	SNP	G	G	A	c.743G>A	c.(742-744)cGa>cAa	p.R248Q
11	108122714	1		1	1	1	1	381	345	0.475207	HCT15	ATM	472	hg19	11	108122714	108122714	+	Missense_Mutation	SNP	G	G	T	c.1758G>T	c.(1756-1758)gaG>gaT	p.E586D
11	108123578	1		1	1	1	1	579	463	0.444338	OVCAR-8	ATM	472	hg19	11	108123578	108123578	+	Missense_Mutation	SNP	G	G	T	c.1837G>T	c.(1837-1839)Gtg>Ttg	p.V613L
11	108138003	1		0	0	0	0	678	573	0.458034	KM-12	ATM	472	hg19	11	108138003	108138003	+	Missense_Mutation	SNP	T	T	C	c.2572T>C	c.(2572-2574)Ttt>Ctt	p.F858L
11	108138003	1		0	0	0	1	1454	699	0.324663	NCI-H522	ATM	472	hg19	11	108138003	108138003	+	Missense_Mutation	SNP	T	T	C	c.2572T>C	c.(2572-2574)Ttt>Ctt	p.F858L
11	108150313	1		0	1	1	1	433	422	0.493567	HCT116	ATM	472	hg19	11	108150313	108150313	+	Missense_Mutation	SNP	C	C	T	c.3380C>T	c.(3379-3381)gCt>gTt	p.A1127V
11	108160327	1		1	1	1	1	194	266	0.578261	SK-OV-3	ATM	472	hg19	11	108160327	108160327	+	Splice_Site	SNP	A	A	G		c.e30-1
11	108175455	1		0	0	0	0	542	228	0.296104	NCI-H226	ATM	472	hg19	11	108175455	108175455	+	Missense_Mutation	SNP	A	A	T	c.5550A>T	c.(5548-5550)ttA>ttT	p.L1850F
11	108178705	1		1	1	1	1	9	804	0.98893	NCI-H23	ATM	472	hg19	11	108178705	108178705	+	Missense_Mutation	SNP	A	A	C	c.5756A>C	c.(5755-5757)cAa>cCa	p.Q1919P
11	108200941	1		1	1	1	1	245	215	0.467391	786-O	ATM	472	hg19	11	108200941	108200941	+	Splice_Site	SNP	A	A	C	c.7308A>C	c.(7306-7308)agA>agC	p.R2436S
11	108213965	1		1	1	1	1	524	413	0.440768	KM-12	ATM	472	hg19	11	108213965	108213965	+	Missense_Mutation	SNP	A	A	G	c.8285A>G	c.(8284-8286)cAg>cGg	p.Q2762R
12	4385274	1		1	1	1	1	453	392	0.463905	HCT15	CCND2	894	hg19	12	4385274	4385274	+	Missense_Mutation	SNP	T	T	G	c.299T>G	c.(298-300)cTc>cGc	p.L100R
12	4409098	1		1	1	1	1	593	393	0.39858	RPMI-8226	CCND2	894	hg19	12	4409098	4409098	+	Nonsense_Mutation	SNP	C	C	T	c.793C>T	c.(793-795)Caa>Taa	p.Q265*
12	4409155	1		1	1	1	1	1040	140	0.118644	SW620	CCND2	894	hg19	12	4409155	4409155	+	Missense_Mutation	SNP	G	G	A	c.850G>A	c.(850-852)Gtg>Atg	p.V284M
12	11905427	1		0	1	1	0	314	289	0.47927	HCT15	ETV6	2120	hg19	12	11905427	11905427	+	Missense_Mutation	SNP	G	G	C	c.77G>C	c.(76-78)aGt>aCt	p.S26T
12	12022496	1		0	0	0	0	0	631	1	NCI-H522	ETV6	2120	hg19	12	12022496	12022496	+	Missense_Mutation	SNP	T	T	C	c.602T>C	c.(601-603)cTc>cCc	p.L201P
12	12022555	1		0	0	0	0	545	255	0.31875	HCT15	ETV6	2120	hg19	12	12022555	12022555	+	Missense_Mutation	SNP	C	C	T	c.661C>T	c.(661-663)Ccc>Tcc	p.P221S
12	12022670	1		0	1	1	1	1	522	0.998088	DU145	ETV6	2120	hg19	12	12022670	12022670	+	Missense_Mutation	SNP	G	G	T	c.776G>T	c.(775-777)cGg>cTg	p.R259L
12	12038893	1		1	1	1	1	411	667	0.618738	HT29	ETV6	2120	hg19	12	12038893	12038893	+	Missense_Mutation	SNP	A	A	G	c.1186A>G	c.(1186-1188)Aga>Gga	p.R396G
12	12871129	1		0	0	0	0	158	341	0.683367	786-O	CDKN1B	1027	hg19	12	12871129	12871129	+	Missense_Mutation	SNP	T	T	C	c.356T>C	c.(355-357)aTt>aCt	p.I119T
12	25378636	1		1	1	1	1	581	473	0.448767	OVCAR-8	KRAS	3845	hg19	12	25378636	25378636	+	Missense_Mutation	SNP	G	G	T	c.362C>A	c.(361-363)cCt>cAt	p.P121H
12	25380275	1		1	1	1	1	4	938	0.995754	NCI-H460	KRAS	3845	hg19	12	25380275	25380275	+	Missense_Mutation	SNP	T	T	A	c.183A>T	c.(181-183)caA>caT	p.Q61H
12	25380277	1		1	1	1	1	819	1449	0.638889	CALU6	KRAS	3845	hg19	12	25380277	25380277	+	Missense_Mutation	SNP	G	G	T	c.181C>A	c.(181-183)Caa>Aaa	p.Q61K
12	25398281	1		1	1	1	1	391	374	0.488889	HCT116	KRAS	3845	hg19	12	25398281	25398281	+	Missense_Mutation	SNP	C	C	T	c.38G>A	c.(37-39)gGc>gAc	p.G13D
12	25398281	1		1	1	1	1	455	347	0.432668	HCT15	KRAS	3845	hg19	12	25398281	25398281	+	Missense_Mutation	SNP	C	C	T	c.38G>A	c.(37-39)gGc>gAc	p.G13D
12	25398281	1		1	1	1	1	161	455	0.738636	MDA-MB-231	KRAS	3845	hg19	12	25398281	25398281	+	Missense_Mutation	SNP	C	C	T	c.38G>A	c.(37-39)gGc>gAc	p.G13D
12	25398284	1		1	1	1	1	356	751	0.67841	RPMI-8226	KRAS	3845	hg19	12	25398284	25398284	+	Missense_Mutation	SNP	C	C	G	c.35G>C	c.(34-36)gGt>gCt	p.G12A
12	25398284	1		1	1	1	1	5	2002	0.997509	SW620	KRAS	3845	hg19	12	25398284	25398284	+	Missense_Mutation	SNP	C	C	A	c.35G>T	c.(34-36)gGt>gTt	p.G12V
12	25398285	1		1	1	1	1	0	713	1	A549	KRAS	3845	hg19	12	25398285	25398285	+	Missense_Mutation	SNP	C	C	T	c.34G>A	c.(34-36)Ggt>Agt	p.G12S
12	25398285	1		1	1	1	1	354	1186	0.77013	NCI-H23	KRAS	3845	hg19	12	25398285	25398285	+	Missense_Mutation	SNP	C	C	A	c.34G>T	c.(34-36)Ggt>Tgt	p.G12C
12	56478826	1		0	0	0	0	1164	296	0.20274	HCT15	ERBB3	2065	hg19	12	56478826	56478826	+	Missense_Mutation	SNP	C	C	A	c.282C>A	c.(280-282)ttC>ttA	p.F94L
12	56478922	1		1	1	1	1	866	847	0.494454	HCT15	ERBB3	2065	hg19	12	56478922	56478922	+	Missense_Mutation	SNP	C	C	A	c.378C>A	c.(376-378)aaC>aaA	p.N126K
12	56481853	1		1	1	1	1	452	349	0.435705	HCT116	ERBB3	2065	hg19	12	56481853	56481853	+	Nonsense_Mutation	SNP	C	C	T	c.781C>T	c.(781-783)Cag>Tag	p.Q261*
12	56488312	1		0	1	1	1	187	384	0.672504	K562	ERBB3	2065	hg19	12	56488312	56488312	+	Missense_Mutation	SNP	C	C	T	c.1831C>T	c.(1831-1833)Cgg>Tgg	p.R611W
12	56489535	1		1	1	1	1	879	764	0.465003	HCT15	ERBB3	2065	hg19	12	56489535	56489535	+	Missense_Mutation	SNP	G	G	A	c.2000G>A	c.(1999-2001)cGt>cAt	p.R667H
12	56490580	1		1	1	1	1	615	652	0.514601	IGROV-1	ERBB3	2065	hg19	12	56490580	56490580	+	Missense_Mutation	SNP	A	A	G	c.2224A>G	c.(2224-2226)Aaa>Gaa	p.K742E
12	56495068	1		1	1	1	1	409	414	0.503038	HCT15	ERBB3	2065	hg19	12	56495068	56495068	+	Missense_Mutation	SNP	C	C	A	c.3425C>A	c.(3424-3426)cCt>cAt	p.P1142H
13	28578215	1		1	1	1	1	297	228	0.434286	HCT116	FLT3	2322	hg19	13	28578215	28578215	+	Frame_Shift_Del	DEL	GA	GA	-	c.2956delTC	c.(2956-2958)tccfs	p.S986fs
13	28599051	1		0	0	0	1	769	192	0.199792	IGROV-1	FLT3	2322	hg19	13	28599051	28599051	+	Missense_Mutation	SNP	T	T	C	c.2237A>G	c.(2236-2238)cAc>cGc	p.H746R
13	28599075	1		1	1	1	1	211	192	0.476427	NCI-H23	FLT3	2322	hg19	13	28599075	28599075	+	Missense_Mutation	SNP	G	G	T	c.2213C>A	c.(2212-2214)cCt>cAt	p.P738H
13	28610141	1		0	1	1	0	651	449	0.408182	SK-OV-3	FLT3	2322	hg19	13	28610141	28610141	+	Missense_Mutation	SNP	G	G	A	c.1349C>T	c.(1348-1350)gCg>gTg	p.A450V
13	28622514	1		0	1	1	1	713	253	0.261905	MCF7	FLT3	2322	hg19	13	28622514	28622514	+	Missense_Mutation	SNP	C	C	T	c.1103G>A	c.(1102-1104)tGt>tAt	p.C368Y
13	28622515	1		0	1	1	1	697	253	0.266316	MCF7	FLT3	2322	hg19	13	28622515	28622515	+	Missense_Mutation	SNP	A	A	T	c.1102T>A	c.(1102-1104)Tgt>Agt	p.C368S
13	28623588	1		1	1	1	1	294	276	0.484211	A549	FLT3	2322	hg19	13	28623588	28623588	+	Missense_Mutation	SNP	G	G	T	c.969C>A	c.(967-969)aaC>aaA	p.N323K
13	28626706	1		1	1	1	1	585	542	0.480923	HCT116	FLT3	2322	hg19	13	28626706	28626706	+	Missense_Mutation	SNP	A	A	G	c.590T>C	c.(589-591)gTg>gCg	p.V197A
13	28626716	1		0	0	0	0	808	456	0.360759	IGROV-1	FLT3	2322	hg19	13	28626716	28626716	+	Missense_Mutation	SNP	C	C	T	c.580G>A	c.(580-582)Gtg>Atg	p.V194M
13	28626716	1		0	0	0	0	568	433	0.432567	NCI-H460	FLT3	2322	hg19	13	28626716	28626716	+	Missense_Mutation	SNP	C	C	T	c.580G>A	c.(580-582)Gtg>Atg	p.V194M
13	28636197	1		0	1	1	1	353	277	0.439683	SK-OV-3	FLT3	2322	hg19	13	28636197	28636197	+	Missense_Mutation	SNP	A	A	C	c.175T>G	c.(175-177)Tcc>Gcc	p.S59A
13	28895721	1		1	1	1	1	4	449	0.99117	Hs-578-T	FLT1	2321	hg19	13	28895721	28895721	+	Splice_Site	SNP	C	C	T	c.3053G>A	c.(3052-3054)tGc>tAc	p.C1018Y
13	28897002	1		0	1	1	1	0	515	1	786-O	FLT1	2321	hg19	13	28897002	28897002	+	Missense_Mutation	SNP	C	C	T	c.2878G>A	c.(2878-2880)Gtc>Atc	p.V960I
13	28964154	1		1	1	1	1	1	854	0.99883	DU145	FLT1	2321	hg19	13	28964154	28964154	+	Frame_Shift_Del	DEL	A	A	-	c.1748delT	c.(1747-1749)ttafs	p.L583fs
13	29005326	1		0	1	1	1	516	518	0.500967	HCT116	FLT1	2321	hg19	13	29005326	29005326	+	Missense_Mutation	SNP	C	C	T	c.935G>A	c.(934-936)cGt>cAt	p.R312H
13	29005423	1		1	1	1	1	1227	397	0.244458	COLO-205	FLT1	2321	hg19	13	29005423	29005423	+	Nonsense_Mutation	SNP	G	G	A	c.838C>T	c.(838-840)Cga>Tga	p.R280*
13	32907075	1		0	1	1	1	424	398	0.484185	HCT15	BRCA2	675	hg19	13	32907075	32907075	+	Missense_Mutation	SNP	C	C	T	c.1460C>T	c.(1459-1461)gCa>gTa	p.A487V
13	32912090	1		1	1	1	1	620	559	0.474131	HCT15	BRCA2	675	hg19	13	32912090	32912090	+	Frame_Shift_Del	DEL	TG	TG	-	c.3598delTG	c.(3598-3600)tggfs	p.W1200fs
13	32913187	1		0	1	1	1	560	398	0.415449	KM-12	BRCA2	675	hg19	13	32913187	32913187	+	Missense_Mutation	SNP	G	G	T	c.4695G>T	c.(4693-4695)aaG>aaT	p.K1565N
13	32913837	1		1	1	1	1	373	397	0.515584	HCT15	BRCA2	675	hg19	13	32913837	32913837	+	Frame_Shift_Del	DEL	A	A	-	c.5345delA	c.(5344-5346)caafs	p.Q1782fs
13	32913837	1		1	1	1	1	435	388	0.471446	KM-12	BRCA2	675	hg19	13	32913837	32913837	+	Frame_Shift_Del	DEL	A	A	-	c.5345delA	c.(5344-5346)caafs	p.Q1782fs
13	32918704	1		1	1	1	1	0	41	1	DU145	BRCA2	675	hg19	13	32918704	32918704	+	Missense_Mutation	SNP	C	C	T	c.6851C>T	c.(6850-6852)tCa>tTa	p.S2284L
13	32937355	1		1	1	1	1	368	313	0.459618	HCT116	BRCA2	675	hg19	13	32937355	32937355	+	Frame_Shift_Ins	INS	-	-	A	c.8016_8016insA	c.(8017-8019)aaafs	p.K2673fs
13	32944558	1		1	1	1	1	315	339	0.518349	HCT15	BRCA2	675	hg19	13	32944558	32944558	+	Missense_Mutation	SNP	G	G	A	c.8351G>A	c.(8350-8352)cGg>cAg	p.R2784Q
13	32969017	1		1	1	1	1	534	197	0.269494	IGROV-1	BRCA2	675	hg19	13	32969017	32969017	+	Missense_Mutation	SNP	C	C	A	c.9448C>A	c.(9448-9450)Cca>Aca	p.P3150T
13	49030479	1		0	1	1	1	477	124	0.206323	IGROV-1	RB1	5925	hg19	13	49030479	49030479	+	Frame_Shift_Del	DEL	A	A	-	c.1954delA	c.(1954-1956)aaafs	p.K653fs
13	49037903	1		1	1	1	1	0	416	1	DU145	RB1	5925	hg19	13	49037903	49037903	+	Nonsense_Mutation	SNP	A	A	T	c.2143A>T	c.(2143-2145)Aag>Tag	p.K715*
13	49050912	1		0	0	0	0	0	2	1	MDA-MB-468	RB1	5925	hg19	13	49050912	49050912	+	Missense_Mutation	SNP	A	A	G	c.2596A>G	c.(2596-2598)Agc>Ggc	p.S866G
14	35872562	1		1	1	1	1	152	123	0.447273	HCT15	NFKBIA	4792	hg19	14	35872562	35872562	+	Missense_Mutation	SNP	G	G	T	c.341C>A	c.(340-342)cCa>cAa	p.P114Q
14	36987138	1		1	1	1	1	429	166	0.278992	SK-OV-3	NKX2-1	7080	hg19	14	36987138	36987138	+	Missense_Mutation	SNP	G	G	A	c.461C>T	c.(460-462)gCc>gTc	p.A154V
14	36987226	1		0	0	0	0	175	109	0.383803	HCT15	NKX2-1	7080	hg19	14	36987226	36987226	+	Splice_Site	SNP	C	C	G		c.e3-1
15	66729193	1		1	1	1	1	801	555	0.409292	NCI-H460	MAP2K1	5604	hg19	15	66729193	66729193	+	Missense_Mutation	SNP	A	A	G	c.401A>G	c.(400-402)tAc>tGc	p.Y134C
15	88420176	1		1	1	1	1	235	175	0.426829	HCT116	NTRK3	4916	hg19	15	88420176	88420176	+	Missense_Mutation	SNP	A	A	G	c.2510T>C	c.(2509-2511)aTt>aCt	p.I837T
15	88476310	1		1	1	1	1	756	413	0.353293	DU145	NTRK3	4916	hg19	15	88476310	88476310	+	Missense_Mutation	SNP	C	C	A	c.1822G>T	c.(1822-1824)Ggc>Tgc	p.G608C
15	88679254	1		1	1	1	1	623	742	0.54359	DU145	NTRK3	4916	hg19	15	88679254	88679254	+	Frame_Shift_Del	DEL	G	G	-	c.783delC	c.(781-783)accfs	p.T261fs
15	99251301	1		0	0	0	0	768	85	0.0996483	HCT15	IGF1R	3480	hg19	15	99251301	99251301	+	Missense_Mutation	SNP	A	A	G	c.605A>G	c.(604-606)aAc>aGc	p.N202S
15	99465549	1		1	1	1	1	838	794	0.48652	HCT15	IGF1R	3480	hg19	15	99465549	99465549	+	Missense_Mutation	SNP	A	A	G	c.2374A>G	c.(2374-2376)Aac>Gac	p.N792D
15	99467856	1		0	0	0	1	755	120	0.137143	DU145	IGF1R	3480	hg19	15	99467856	99467856	+	Frame_Shift_Ins	INS	-	-	TC	c.2725_2725insTC	c.(2725-2727)tctfs	p.S909fs
15	99472828	1		0	1	1	1	916	799	0.465889	IGROV-1	IGF1R	3480	hg19	15	99472828	99472828	+	Missense_Mutation	SNP	G	G	A	c.2824G>A	c.(2824-2826)Gtc>Atc	p.V942I
16	2103373	1		0	0	0	1	126	146	0.536765	HCT15	TSC2	7249	hg19	16	2103373	2103373	+	Missense_Mutation	SNP	G	G	A	c.256G>A	c.(256-258)Gcg>Acg	p.A86T
16	2103389	1		0	0	0	0	86	172	0.666667	T47D	TSC2	7249	hg19	16	2103389	2103389	+	Missense_Mutation	SNP	C	C	T	c.272C>T	c.(271-273)cCg>cTg	p.P91L
16	2108752	1		0	0	0	1	192	149	0.43695	HCT15	TSC2	7249	hg19	16	2108752	2108752	+	Missense_Mutation	SNP	T	T	C	c.853T>C	c.(853-855)Tac>Cac	p.Y285H
16	2108755	1		0	0	0	0	116	199	0.631746	K562	TSC2	7249	hg19	16	2108755	2108755	+	Missense_Mutation	SNP	A	A	G	c.856A>G	c.(856-858)Atg>Gtg	p.M286V
16	2124228	1		1	1	1	1	415	261	0.386095	LOXIMVI	TSC2	7249	hg19	16	2124228	2124228	+	Missense_Mutation	SNP	G	G	A	c.2383G>A	c.(2383-2385)Ggc>Agc	p.G795S
16	2129309	1		1	1	1	1	547	482	0.468416	IGROV-1	TSC2	7249	hg19	16	2129309	2129309	+	Missense_Mutation	SNP	G	G	A	c.3164G>A	c.(3163-3165)gGc>gAc	p.G1055D
16	2129650	1		1	0	0	0	154	198	0.5625	786-O	TSC2	7249	hg19	16	2129650	2129650	+	Missense_Mutation	SNP	A	A	T	c.3377A>T	c.(3376-3378)gAt>gTt	p.D1126V
16	2134539	1		0	0	0	0	0	346	1	NCI-H23	TSC2	7249	hg19	16	2134539	2134539	+	Missense_Mutation	SNP	G	G	A	c.4316G>A	c.(4315-4317)gGc>gAc	p.G1439D
16	2138234	1		0	0	0	0	491	66	0.118492	IGROV-1	TSC2	7249	hg19	16	2138234	2138234	+	Missense_Mutation	SNP	T	T	C	c.5167T>C	c.(5167-5169)Tca>Cca	p.S1723P
16	2138300	1		0	1	1	1	336	207	0.381215	KM-12	TSC2	7249	hg19	16	2138300	2138300	+	Missense_Mutation	SNP	C	C	T	c.5233C>T	c.(5233-5235)Cgc>Tgc	p.R1745C
16	3779755	1		0	1	1	1	383	378	0.496715	DU145	CREBBP	1387	hg19	16	3779755	3779755	+	Frame_Shift_Del	DEL	G	G	-	c.5293delC	c.(5293-5295)cagfs	p.Q1765fs
16	3781375	1		1	0	0	1	335	230	0.40708	KM-12	CREBBP	1387	hg19	16	3781375	3781375	+	Missense_Mutation	SNP	G	G	A	c.4990C>T	c.(4990-4992)Cgc>Tgc	p.R1664C
16	3786205	1		1	1	1	1	558	543	0.493188	HCT15	CREBBP	1387	hg19	16	3786205	3786205	+	Splice_Site	SNP	C	C	A		c.e28-1
16	3807941	1		1	1	1	1	886	845	0.488157	IGROV-1	CREBBP	1387	hg19	16	3807941	3807941	+	Missense_Mutation	SNP	T	T	C	c.3478A>G	c.(3478-3480)Atg>Gtg	p.M1160V
16	3807970	1		1	1	1	1	640	492	0.434629	HCT15	CREBBP	1387	hg19	16	3807970	3807970	+	Missense_Mutation	SNP	G	G	T	c.3449C>A	c.(3448-3450)cCc>cAc	p.P1150H
16	3820773	1		1	1	1	1	0	624	1	OVCAR-8	CREBBP	1387	hg19	16	3820773	3820773	+	Nonsense_Mutation	SNP	G	G	T	c.2678C>A	c.(2677-2679)tCg>tAg	p.S893*
16	3831230	1		0	0	0	0	348	439	0.557814	HT29	CREBBP	1387	hg19	16	3831230	3831230	+	Missense_Mutation	SNP	G	G	T	c.1651C>A	c.(1651-1653)Ctt>Att	p.L551I
16	30128570	1		0	1	1	1	922	246	0.210616	DU145	MAPK3	5595	hg19	16	30128570	30128570	+	Missense_Mutation	SNP	C	C	T	c.812G>A	c.(811-813)tGt>tAt	p.C271Y
16	31201442	1		0	0	0	0	80	33	0.292035	A549	FUS	2521	hg19	16	31201442	31201442	+	Missense_Mutation	SNP	G	G	A	c.1148G>A	c.(1147-1149)cGt>cAt	p.R383H
16	68835766	1		1	1	1	1	328	209	0.389199	HCT116	CDH1	999	hg19	16	68835766	68835766	+	Frame_Shift_Del	DEL	G	G	-	c.357delG	c.(355-357)gtgfs	p.V119fs
16	68835796	1		0	0	0	0	451	102	0.184448	HCT15	CDH1	999	hg19	16	68835796	68835796	+	Splice_Site	SNP	G	G	T	c.387G>T	c.(385-387)caG>caT	p.Q129H
16	68847399	1		1	1	1	1	1194	476	0.28503	DU145	CDH1	999	hg19	16	68847399	68847399	+	Splice_Site	SNP	G	G	A		c.e9+1
16	68867203	1		1	1	1	1	396	374	0.485714	RPMI-8226	CDH1	999	hg19	16	68867203	68867203	+	Missense_Mutation	SNP	C	C	T	c.2450C>T	c.(2449-2451)gCg>gTg	p.A817V
17	7569546	1		0	0	0	0	0	213	1	RPMI-8226	TP53	7157	hg19	17	7569546	7569546	+	Missense_Mutation	SNP	C	C	G	c.1010G>C	c.(1009-1011)aGg>aCg	p.R337T
17	7573010	1		0	1	1	1	349	385	0.524523	HCT15	TP53	7157	hg19	17	7573010	7573010	+	Splice_Site	SNP	T	T	G		c.e11-2
17	7576921	1		0	1	1	1	1	1850	0.99946	SW620	TP53	7157	hg19	17	7576921	7576921	+	Missense_Mutation	SNP	G	G	A	c.925C>T	c.(925-927)Ccc>Tcc	p.P309S
17	7577085	1		1	1	1	1	8	789	0.989962	RPMI-8226	TP53	7157	hg19	17	7577085	7577085	+	Missense_Mutation	SNP	C	C	T	c.853G>A	c.(853-855)Gag>Aag	p.E285K
17	7577099	1		1	1	1	1	2	1208	0.998347	MDA-MB-231	TP53	7157	hg19	17	7577099	7577099	+	Missense_Mutation	SNP	C	C	T	c.839G>A	c.(838-840)aGa>aAa	p.R280K
17	7577106	1		0	1	1	1	575	579	0.501733	786-O	TP53	7157	hg19	17	7577106	7577106	+	Missense_Mutation	SNP	G	G	C	c.832C>G	c.(832-834)Cct>Gct	p.P278A
17	7577118	1		1	1	1	1	379	700	0.648749	DU145	TP53	7157	hg19	17	7577118	7577118	+	Missense_Mutation	SNP	C	C	A	c.820G>T	c.(820-822)Gtt>Ttt	p.V274F
17	7577120	1		0	1	1	1	0	738	1	HT29	TP53	7157	hg19	17	7577120	7577120	+	Missense_Mutation	SNP	C	C	T	c.818G>A	c.(817-819)cGt>cAt	p.R273H
17	7577120	1		0	1	1	1	0	558	1	MDA-MB-468	TP53	7157	hg19	17	7577120	7577120	+	Missense_Mutation	SNP	C	C	T	c.818G>A	c.(817-819)cGt>cAt	p.R273H
17	7577120	1		0	1	1	1	2	1210	0.99835	SW620	TP53	7157	hg19	17	7577120	7577120	+	Missense_Mutation	SNP	C	C	T	c.818G>A	c.(817-819)cGt>cAt	p.R273H
17	7577534	1		0	1	1	1	0	1149	1	BT-549	TP53	7157	hg19	17	7577534	7577534	+	Missense_Mutation	SNP	C	C	G	c.747G>C	c.(745-747)agG>agC	p.R249S
17	7577538	1		1	1	1	1	6	564	0.989474	OVCAR-3	TP53	7157	hg19	17	7577538	7577538	+	Missense_Mutation	SNP	C	C	T	c.743G>A	c.(742-744)cGg>cAg	p.R248Q
17	7577538	1		1	1	1	1	1	887	0.998874	SF-295	TP53	7157	hg19	17	7577538	7577538	+	Missense_Mutation	SNP	C	C	T	c.743G>A	c.(742-744)cGg>cAg	p.R248Q
17	7577543	1		1	1	1	1	1	970	0.99897	NCI-H23	TP53	7157	hg19	17	7577543	7577543	+	Missense_Mutation	SNP	C	C	G	c.738G>C	c.(736-738)atG>atC	p.M246I
17	7577559	1		1	0	1	1	396	379	0.489032	HCT15	TP53	7157	hg19	17	7577559	7577559	+	Missense_Mutation	SNP	G	G	A	c.722C>T	c.(721-723)tCc>tTc	p.S241F
17	7578181	1		0	0	1	1	574	214	0.271574	DU145	TP53	7157	hg19	17	7578181	7578181	+	Missense_Mutation	SNP	G	G	A	c.668C>T	c.(667-669)cCt>cTt	p.P223L
17	7578263	1		1	1	1	1	2	676	0.99705	CALU6	TP53	7157	hg19	17	7578263	7578263	+	Nonsense_Mutation	SNP	G	G	A	c.586C>T	c.(586-588)Cga>Tga	p.R196*
17	7578269	1		1	1	1	1	0	510	1	T47D	TP53	7157	hg19	17	7578269	7578269	+	Missense_Mutation	SNP	G	G	A	c.580C>T	c.(580-582)Ctt>Ttt	p.L194F
17	7578277	1		1	1	1	1	0	786	1	NCI-H522	TP53	7157	hg19	17	7578277	7578277	+	Frame_Shift_Del	DEL	G	G	-	c.572delC	c.(571-573)cctfs	p.P191fs
17	7578291	1		0	1	1	1	496	428	0.463203	786-O	TP53	7157	hg19	17	7578291	7578291	+	Splice_Site	SNP	T	T	C		c.e6-2
17	7578394	1		1	1	1	1	293	285	0.49308	KM-12	TP53	7157	hg19	17	7578394	7578394	+	Missense_Mutation	SNP	T	T	C	c.536A>G	c.(535-537)cAt>cGt	p.H179R
17	7578461	1		1	1	1	1	8	960	0.991736	Hs-578-T	TP53	7157	hg19	17	7578461	7578461	+	Missense_Mutation	SNP	C	C	A	c.469G>T	c.(469-471)Gtc>Ttc	p.V157F
17	7578516	1		1	1	1	1	0	636	1	PC-3	TP53	7157	hg19	17	7578516	7578516	+	Frame_Shift_Del	DEL	G	G	-	c.414delC	c.(412-414)gccfs	p.A138fs
17	7578524	1		1	1	1	1	0	285	1	K562	TP53	7157	hg19	17	7578524	7578524	+	Frame_Shift_Ins	INS	-	-	G	c.406_406insC	c.(406-408)caafs	p.Q136fs
17	7578542	1		1	1	1	1	2	431	0.995381	OVCAR-4	TP53	7157	hg19	17	7578542	7578542	+	Missense_Mutation	SNP	G	G	C	c.388C>G	c.(388-390)Ctc>Gtc	p.L130V
17	7578553	1		1	1	1	1	329	318	0.491499	IGROV-1	TP53	7157	hg19	17	7578553	7578553	+	Splice_Site	SNP	T	T	C	c.377A>G	c.(376-378)tAc>tGc	p.Y126C
17	7578555	1		1	1	1	1	2	321	0.993808	OVCAR-8	TP53	7157	hg19	17	7578555	7578555	+	Splice_Site	SNP	C	C	T		c.e5-1
17	7579354	1		0	1	1	0	0	179	1	COLO-205	TP53	7157	hg19	17	7579354	7579354	+	Frame_Shift_Del	DEL	CAGACGGAAACCG	CAGACGGAAACCG	-	c.333delCGGTTTCCGTCTG	c.(331-333)ctcfs	p.L111fs
17	7579369	1		0	0	0	0	0	181	1	COLO-205	TP53	7157	hg19	17	7579369	7579369	+	Frame_Shift_Del	DEL	GCTGCCCTGGT	GCTGCCCTGGT	-	c.318delACCAGGGCAGC	c.(316-318)agafs	p.R106fs
17	7579420	1		0	1	1	1	203	47	0.188	IGROV-1	TP53	7157	hg19	17	7579420	7579420	+	Frame_Shift_Ins	INS	-	-	G	c.267_267insC	c.(265-267)cccfs	p.P89fs
17	7579420	1		0	1	1	1	0	143	1	SK-OV-3	TP53	7157	hg19	17	7579420	7579420	+	Frame_Shift_Del	DEL	G	G	-	c.267delC	c.(265-267)cccfs	p.P89fs
17	7579471	1		0	1	1	1	162	111	0.406593	KM-12	TP53	7157	hg19	17	7579471	7579471	+	Frame_Shift_Del	DEL	G	G	-	c.216delC	c.(214-216)cccfs	p.P72fs
17	17117006	1		0	0	0	1	1024	203	0.165444	IGROV-1	FLCN	201163	hg19	17	17117006	17117006	+	Missense_Mutation	SNP	G	G	A	c.1703C>T	c.(1702-1704)aCg>aTg	p.T568M
17	17119709	1		0	0	0	1	249	181	0.42093	HCT116	FLCN	201163	hg19	17	17119709	17119709	+	Frame_Shift_Ins	INS	-	-	G	c.1285_1285insC	c.(1285-1287)cacfs	p.H429fs
17	17119792	1		0	1	1	0	0	451	1	NCI-H23	FLCN	201163	hg19	17	17119792	17119792	+	Missense_Mutation	SNP	C	C	T	c.1202G>A	c.(1201-1203)cGc>cAc	p.R401H
17	29486044	1		0	0	0	1	262	224	0.460905	HCT15	NF1	4763	hg19	17	29486044	29486044	+	Missense_Mutation	SNP	C	C	A	c.221C>A	c.(220-222)gCt>gAt	p.A74D
17	29528154	1		1	1	1	1	376	347	0.479945	HCT116	NF1	4763	hg19	17	29528154	29528154	+	Missense_Mutation	SNP	C	C	A	c.1162C>A	c.(1162-1164)Cct>Act	p.P388T
17	29541474	1		1	1	1	1	0	281	1	MDA-MB-231	NF1	4763	hg19	17	29541474	29541474	+	Frame_Shift_Ins	INS	-	-	C	c.1398_1398insC	c.(1399-1401)acafs	p.T467fs
17	29553478	1		1	1	1	1	259	356	0.578862	HCT116	NF1	4763	hg19	17	29553478	29553478	+	Frame_Shift_Del	DEL	C	C	-	c.2027delC	c.(2026-2028)accfs	p.T676fs
17	29553478	1		0	0	0	0	438	214	0.328221	KM-12	NF1	4763	hg19	17	29553478	29553478	+	Frame_Shift_Ins	INS	-	-	C	c.2027_2027insC	c.(2026-2028)accfs	p.T676fs
17	29556466	1		1	1	1	1	434	359	0.452711	KM-12	NF1	4763	hg19	17	29556466	29556466	+	Missense_Mutation	SNP	T	T	C	c.2833T>C	c.(2833-2835)Ttt>Ctt	p.F945L
17	29560043	1		1	1	1	1	764	708	0.480978	LOXIMVI	NF1	4763	hg19	17	29560043	29560043	+	Nonsense_Mutation	SNP	C	C	T	c.3520C>T	c.(3520-3522)Cag>Tag	p.Q1174*
17	29576109	1		1	1	1	1	826	608	0.423989	KM-12	NF1	4763	hg19	17	29576109	29576109	+	Missense_Mutation	SNP	T	T	G	c.4082T>G	c.(4081-4083)cTt>cGt	p.L1361R
17	29653106	1		1	1	1	1	579	724	0.555641	SK-OV-3	NF1	4763	hg19	17	29653106	29653106	+	Missense_Mutation	SNP	G	G	T	c.5104G>T	c.(5104-5106)Ggt>Tgt	p.G1702C
17	29677294	1		1	1	1	1	295	581	0.663242	DU145	NF1	4763	hg19	17	29677294	29677294	+	Missense_Mutation	SNP	C	C	A	c.7415C>A	c.(7414-7416)cCt>cAt	p.P2472H
17	29677308	1		1	1	1	1	467	406	0.465063	HCT15	NF1	4763	hg19	17	29677308	29677308	+	Missense_Mutation	SNP	C	C	T	c.7429C>T	c.(7429-7431)Ccc>Tcc	p.P2477S
17	29684089	1		1	1	1	1	516	432	0.455696	HCT15	NF1	4763	hg19	17	29684089	29684089	+	Missense_Mutation	SNP	C	C	T	c.7850C>T	c.(7849-7851)gCg>gTg	p.A2617V
17	29687577	1		1	1	1	1	986	606	0.380653	Hs-578-T	NF1	4763	hg19	17	29687577	29687577	+	Missense_Mutation	SNP	G	G	A	c.8233G>A	c.(8233-8235)Gga>Aga	p.G2745R
17	29706042	1		0	0	0	0	90	82	0.476744	SK-MEL-5	NF1	4763	hg19	17	29706042	29706042	+	Splice_Site	SNP	G	G	A		c.e16+1
17	37619073	1		1	0	0	1	384	367	0.488682	HCT116	CDK12	51755	hg19	17	37619073	37619073	+	Missense_Mutation	SNP	C	C	A	c.749C>A	c.(748-750)cCc>cAc	p.P250H
17	37682330	1		0	0	0	1	1321	250	0.159134	IGROV-1	CDK12	51755	hg19	17	37682330	37682330	+	Missense_Mutation	SNP	C	C	T	c.3521C>T	c.(3520-3522)gCc>gTc	p.A1174V
17	37687045	1		0	0	0	0	458	180	0.282132	KM-12	CDK12	51755	hg19	17	37687045	37687045	+	Missense_Mutation	SNP	C	C	T	c.3949C>T	c.(3949-3951)Cca>Tca	p.P1317S
17	37865585	1		1	1	1	1	2	451	0.995585	MDA-MB-468	ERBB2	2064	hg19	17	37865585	37865585	+	Frame_Shift_Del	DEL	G	G	-	c.454delG	c.(454-456)gggfs	p.G152fs
17	37879585	1		0	0	0	0	1	336	0.997033	MCF7	ERBB2	2064	hg19	17	37879585	37879585	+	Missense_Mutation	SNP	A	A	G	c.1960A>G	c.(1960-1962)Atc>Gtc	p.I654V
17	37880998	1		1	1	1	1	231	186	0.446043	OVCAR-8	ERBB2	2064	hg19	17	37880998	37880998	+	Missense_Mutation	SNP	G	G	T	c.2327G>T	c.(2326-2328)gGt>gTt	p.G776V
17	38512398	1		0	0	0	0	30	22	0.423077	HCT15	RARA	5914	hg19	17	38512398	38512398	+	Missense_Mutation	SNP	C	C	A	c.1309C>A	c.(1309-1311)Ctg>Atg	p.L437M
17	38555311	1		0	0	0	0	685	260	0.275132	KM-12	TOP2A	7153	hg19	17	38555311	38555311	+	Nonsense_Mutation	SNP	C	C	T	c.3269G>A	c.(3268-3270)tGg>tAg	p.W1090*
17	38561121	1		1	0	0	1	312	345	0.525114	HCT116	TOP2A	7153	hg19	17	38561121	38561121	+	Frame_Shift_Ins	INS	-	-	T	c.1968_1968insA	c.(1966-1968)aaafs	p.K656fs
17	38562864	1		1	1	1	1	572	578	0.502609	IGROV-1	TOP2A	7153	hg19	17	38562864	38562864	+	Missense_Mutation	SNP	A	A	T	c.1815T>A	c.(1813-1815)caT>caA	p.H605Q
17	41226488	1		0	0	0	0	575	453	0.440661	KM-12	BRCA1	672	hg19	17	41226488	41226488	+	Missense_Mutation	SNP	C	C	A	c.4535G>T	c.(4534-4536)aGt>aTt	p.S1512I
17	41243979	1		1	1	1	1	558	517	0.48093	HCT15	BRCA1	672	hg19	17	41243979	41243979	+	Missense_Mutation	SNP	G	G	T	c.3569C>A	c.(3568-3570)cCt>cAt	p.P1190H
17	41244664	1		0	1	1	1	1047	504	0.324952	DU145	BRCA1	672	hg19	17	41244664	41244664	+	Missense_Mutation	SNP	C	C	T	c.2884G>A	c.(2884-2886)Gaa>Aaa	p.E962K
17	41245054	1		1	1	1	1	934	894	0.489059	UACC62	BRCA1	672	hg19	17	41245054	41245054	+	Missense_Mutation	SNP	G	G	A	c.2494C>T	c.(2494-2496)Cca>Tca	p.P832S
17	41245560	1		0	1	1	1	809	792	0.494691	HCT15	BRCA1	672	hg19	17	41245560	41245560	+	Missense_Mutation	SNP	C	C	T	c.1988G>A	c.(1987-1989)aGc>aAc	p.S663N
17	41245587	1		1	1	1	1	1072	1093	0.50485	IGROV-1	BRCA1	672	hg19	17	41245587	41245587	+	Frame_Shift_Del	DEL	T	T	-	c.1961delA	c.(1960-1962)aagfs	p.K654fs
17	41246061	1		0	0	0	0	856	382	0.308562	NCI-H23	BRCA1	672	hg19	17	41246061	41246061	+	Missense_Mutation	SNP	C	C	T	c.1487G>A	c.(1486-1488)cGt>cAt	p.R496H
17	41606033	1		0	0	0	0	873	868	0.498564	NCI-H522	ETV4	2118	hg19	17	41606033	41606033	+	Missense_Mutation	SNP	G	G	A	c.1309C>T	c.(1309-1311)Cgt>Tgt	p.R437C
17	41610270	1		0	0	0	0	174	57	0.246753	DU145	ETV4	2118	hg19	17	41610270	41610270	+	Missense_Mutation	SNP	A	A	T	c.583T>A	c.(583-585)Ttc>Atc	p.F195I
17	41622934	1		0	0	0	1	113	35	0.236486	HCT15	ETV4	2118	hg19	17	41622934	41622934	+	Frame_Shift_Ins	INS	-	-	CC	c.52_52insGG	c.(52-54)ttcfs	p.F18fs
17	41622935	1		0	0	0	1	118	39	0.248408	HCT15	ETV4	2118	hg19	17	41622935	41622935	+	Frame_Shift_Del	DEL	GGTGTAGG	GGTGTAGG	-	c.51delCCTACACC	c.(49-51)accfs	p.T17fs
18	45372141	1		0	1	1	1	907	250	0.216076	IGROV-1	SMAD2	4087	hg19	18	45372141	45372141	+	Missense_Mutation	SNP	C	C	T	c.1028G>A	c.(1027-1029)gGg>gAg	p.G343E
18	45422929	1		1	1	1	1	857	518	0.376727	IGROV-1	SMAD2	4087	hg19	18	45422929	45422929	+	Missense_Mutation	SNP	T	T	C	c.199A>G	c.(199-201)Act>Gct	p.T67A
18	48584514	1		0	1	1	1	661	370	0.358875	IGROV-1	SMAD4	4089	hg19	18	48584514	48584514	+	Frame_Shift_Del	DEL	G	G	-	c.687delG	c.(685-687)ctgfs	p.L229fs
18	48586262	1		1	1	1	1	1	605	0.99835	HT29	SMAD4	4089	hg19	18	48586262	48586262	+	Nonsense_Mutation	SNP	C	C	T	c.931C>T	c.(931-933)Cag>Tag	p.Q311*
18	48604662	1		1	1	1	1	243	388	0.614897	IGROV-1	SMAD4	4089	hg19	18	48604662	48604662	+	Missense_Mutation	SNP	T	T	C	c.1484T>C	c.(1483-1485)cTt>cCt	p.L495P
19	1207021	1		0	1	1	1	0	407	1	A549	STK11	6794	hg19	19	1207021	1207021	+	Nonsense_Mutation	SNP	C	C	T	c.109C>T	c.(109-111)Cag>Tag	p.Q37*
19	1207021	1		0	1	1	1	0	493	1	NCI-H460	STK11	6794	hg19	19	1207021	1207021	+	Nonsense_Mutation	SNP	C	C	T	c.109C>T	c.(109-111)Cag>Tag	p.Q37*
19	1220438	1		0	1	1	1	5	881	0.994357	DU145	STK11	6794	hg19	19	1220438	1220438	+	Frame_Shift_Del	DEL	CAAGC	CAAGC	-	c.531delCAAGC	c.(529-531)atcfs	p.I177fs
19	1221948	1		0	0	0	0	313	106	0.252983	KM-12	STK11	6794	hg19	19	1221948	1221948	+	Splice_Site	SNP	G	G	A	c.863G>A	c.(862-864)gGg>gAg	p.G288E
19	1223059	1		1	1	1	1	4	894	0.995546	NCI-H23	STK11	6794	hg19	19	1223059	1223059	+	Nonsense_Mutation	SNP	G	G	A	c.996G>A	c.(994-996)tgG>tgA	p.W332*
19	11096869	1		0	1	1	1	302	313	0.508943	HCT116	SMARCA4	6597	hg19	19	11096869	11096869	+	Frame_Shift_Ins	INS	-	-	C	c.360_360insC	c.(361-363)cccfs	p.P121fs
19	11097098	1		0	0	0	0	314	599	0.656079	Hs-578-T	SMARCA4	6597	hg19	19	11097098	11097098	+	Missense_Mutation	SNP	C	C	T	c.589C>T	c.(589-591)Ccc>Tcc	p.P197S
19	11097098	1		0	0	0	0	361	299	0.45303	KM-12	SMARCA4	6597	hg19	19	11097098	11097098	+	Missense_Mutation	SNP	C	C	T	c.589C>T	c.(589-591)Ccc>Tcc	p.P197S
19	11097625	1		1	1	1	1	2	598	0.996667	NCI-H522	SMARCA4	6597	hg19	19	11097625	11097625	+	Frame_Shift_Del	DEL	CC	CC	-	c.805delCC	c.(805-807)cccfs	p.P270fs
19	11107056	1		0	0	0	1	2	589	0.996616	DU145	SMARCA4	6597	hg19	19	11107056	11107056	+	Splice_Site	SNP	G	G	T	c.1761G>T	c.(1759-1761)aaG>aaT	p.K587N
19	11121117	1		1	1	1	1	2	927	0.997847	A549	SMARCA4	6597	hg19	19	11121117	11121117	+	Frame_Shift_Del	DEL	GCAGTCCTACTATGCCGTGGCCC	GCAGTCCTACTATGCCGTGGCCC	-	c.2184delGCAGTCCTACTATGCCGTGGCCC	c.(2182-2184)ctgfs	p.L728fs
19	11132437	1		1	0	0	1	330	307	0.481947	HCT15	SMARCA4	6597	hg19	19	11132437	11132437	+	Missense_Mutation	SNP	C	C	T	c.2653C>T	c.(2653-2655)Cgc>Tgc	p.R885C
19	11132551	1		1	1	1	1	345	316	0.478064	A498	SMARCA4	6597	hg19	19	11132551	11132551	+	Missense_Mutation	SNP	G	G	C	c.2767G>C	c.(2767-2769)Gcg>Ccg	p.A923P
19	11136172	1		0	1	1	1	4	915	0.995647	SK-MEL-5	SMARCA4	6597	hg19	19	11136172	11136172	+	Frame_Shift_Del	DEL	C	C	-	c.3156delC	c.(3154-3156)ttcfs	p.F1052fs
19	11141511	1		0	0	0	1	240	211	0.467849	HCT116	SMARCA4	6597	hg19	19	11141511	11141511	+	Missense_Mutation	SNP	T	T	C	c.3488T>C	c.(3487-3489)cTg>cCg	p.L1163P
19	11144049	1		1	1	1	1	539	535	0.498138	IGROV-1	SMARCA4	6597	hg19	19	11144049	11144049	+	Frame_Shift_Del	DEL	GGA	GGA	-	c.3630delGGA	c.(3628-3630)gtgfs	p.V1210fs
19	11152058	1		0	0	0	1	616	117	0.159618	IGROV-1	SMARCA4	6597	hg19	19	11152058	11152058	+	Missense_Mutation	SNP	G	G	A	c.4246G>A	c.(4246-4248)Gac>Aac	p.D1416N
19	11152082	1		0	0	0	0	398	174	0.304196	KM-12	SMARCA4	6597	hg19	19	11152082	11152082	+	Missense_Mutation	SNP	C	C	T	c.4270C>T	c.(4270-4272)Ccg>Tcg	p.P1424S
19	11170491	1		1	1	1	1	0	56	1	NCI-H23	SMARCA4	6597	hg19	19	11170491	11170491	+	Missense_Mutation	SNP	G	G	T	c.4698G>T	c.(4696-4698)aaG>aaT	p.K1566N
19	11170492	1		0	1	1	1	0	56	1	NCI-H23	SMARCA4	6597	hg19	19	11170492	11170492	+	Nonsense_Mutation	SNP	G	G	T	c.4699G>T	c.(4699-4701)Gag>Tag	p.E1567*
19	15272005	1		0	0	0	1	200	191	0.488491	SF-295	NOTCH3	4854	hg19	19	15272005	15272005	+	Missense_Mutation	SNP	C	C	T	c.6434G>A	c.(6433-6435)cGg>cAg	p.R2145Q
19	15272060	1		0	0	0	1	338	310	0.478395	IGROV-1	NOTCH3	4854	hg19	19	15272060	15272060	+	Missense_Mutation	SNP	A	A	G	c.6379T>C	c.(6379-6381)Tat>Cat	p.Y2127H
19	15272296	1		0	0	0	1	161	170	0.513595	HCT15	NOTCH3	4854	hg19	19	15272296	15272296	+	Missense_Mutation	SNP	G	G	A	c.6143C>T	c.(6142-6144)gCc>gTc	p.A2048V
19	15272337	1		0	0	0	1	296	235	0.442561	MDA-MB-468	NOTCH3	4854	hg19	19	15272337	15272337	+	Frame_Shift_Ins	INS	-	-	G	c.6102_6102insC	c.(6100-6102)cccfs	p.P2034fs
19	15272498	1		0	0	0	1	197	239	0.548165	OVCAR-3	NOTCH3	4854	hg19	19	15272498	15272498	+	Missense_Mutation	SNP	G	G	A	c.5941C>T	c.(5941-5943)Cgc>Tgc	p.R1981C
19	15276253	1		0	0	0	0	652	426	0.395176	HCT15	NOTCH3	4854	hg19	19	15276253	15276253	+	Missense_Mutation	SNP	G	G	A	c.5741C>T	c.(5740-5742)gCc>gTc	p.A1914V
19	15276316	1		1	1	1	1	350	310	0.469697	HCT15	NOTCH3	4854	hg19	19	15276316	15276316	+	Missense_Mutation	SNP	C	C	T	c.5678G>A	c.(5677-5679)cGa>cAa	p.R1893Q
19	15288527	1		0	0	0	1	52	37	0.41573	HCT15	NOTCH3	4854	hg19	19	15288527	15288527	+	Missense_Mutation	SNP	C	C	A	c.4212G>T	c.(4210-4212)gaG>gaT	p.E1404D
19	15289850	1		0	0	0	0	129	114	0.469136	HT29	NOTCH3	4854	hg19	19	15289850	15289850	+	Missense_Mutation	SNP	T	T	A	c.3704A>T	c.(3703-3705)cAt>cTt	p.H1235L
19	15289850	1		0	0	0	0	96	61	0.388535	OVCAR-8	NOTCH3	4854	hg19	19	15289850	15289850	+	Missense_Mutation	SNP	T	T	A	c.3704A>T	c.(3703-3705)cAt>cTt	p.H1235L
19	15289850	1		0	0	0	0	295	399	0.574928	PC-3	NOTCH3	4854	hg19	19	15289850	15289850	+	Missense_Mutation	SNP	T	T	A	c.3704A>T	c.(3703-3705)cAt>cTt	p.H1235L
19	15298069	1		1	1	1	1	437	410	0.484061	786-O	NOTCH3	4854	hg19	19	15298069	15298069	+	Missense_Mutation	SNP	T	T	A	c.1687A>T	c.(1687-1689)Atc>Ttc	p.I563F
19	15299916	1		1	1	1	1	350	340	0.492754	IGROV-1	NOTCH3	4854	hg19	19	15299916	15299916	+	Missense_Mutation	SNP	C	C	T	c.1262G>A	c.(1261-1263)cGt>cAt	p.R421H
19	15300174	1		1	1	1	1	272	859	0.759505	MDA-MB-231	NOTCH3	4854	hg19	19	15300174	15300174	+	Missense_Mutation	SNP	T	T	A	c.1102A>T	c.(1102-1104)Aca>Tca	p.T368S
19	15302671	1		0	1	1	1	2	616	0.996764	NCI-H460	NOTCH3	4854	hg19	19	15302671	15302671	+	Missense_Mutation	SNP	C	C	G	c.687G>C	c.(685-687)gaG>gaC	p.E229D
19	15302941	1		0	0	0	0	410	208	0.33657	CALU6	NOTCH3	4854	hg19	19	15302941	15302941	+	Missense_Mutation	SNP	T	T	C	c.509A>G	c.(508-510)cAt>cGt	p.H170R
19	15308383	1		0	0	0	1	69	68	0.49635	KM-12	NOTCH3	4854	hg19	19	15308383	15308383	+	Frame_Shift_Del	DEL	G	G	-	c.125delC	c.(124-126)cctfs	p.P42fs
19	15349558	1		0	0	0	1	171	180	0.512821	HCT15	BRD4	23476	hg19	19	15349558	15349558	+	Missense_Mutation	SNP	T	T	C	c.4016A>G	c.(4015-4017)gAa>gGa	p.E1339G
19	15353819	1		0	0	0	0	9	23	0.71875	DU145	BRD4	23476	hg19	19	15353819	15353819	+	Frame_Shift_Del	DEL	G	G	-	c.3061delC	c.(3061-3063)catfs	p.H1021fs
19	15354250	1		0	0	0	0	144	42	0.225806	IGROV-1	BRD4	23476	hg19	19	15354250	15354250	+	Missense_Mutation	SNP	G	G	A	c.2630C>T	c.(2629-2631)gCc>gTc	p.A877V
19	15355374	1		0	0	0	1	3	9	0.75	HCT15	BRD4	23476	hg19	19	15355374	15355374	+	Missense_Mutation	SNP	G	G	A	c.2249C>T	c.(2248-2250)cCg>cTg	p.P750L
19	15367974	1		0	0	0	1	167	184	0.524217	HCT15	BRD4	23476	hg19	19	15367974	15367974	+	Missense_Mutation	SNP	T	T	C	c.1352A>G	c.(1351-1353)gAa>gGa	p.E451G
19	17937589	1		0	1	1	1	300	222	0.425287	HCT15	JAK3	3718	hg19	19	17937589	17937589	+	Missense_Mutation	SNP	T	T	C	c.3338A>G	c.(3337-3339)cAc>cGc	p.H1113R
19	17942205	1		1	1	1	1	466	439	0.485083	IGROV-1	JAK3	3718	hg19	19	17942205	17942205	+	Missense_Mutation	SNP	A	A	G	c.2810T>C	c.(2809-2811)aTg>aCg	p.M937T
19	17943723	1		1	1	1	1	340	175	0.339806	RPMI-8226	JAK3	3718	hg19	19	17943723	17943723	+	Missense_Mutation	SNP	G	G	A	c.2366C>T	c.(2365-2367)tCa>tTa	p.S789L
19	17947989	1		0	0	0	0	88	60	0.405405	SW620	JAK3	3718	hg19	19	17947989	17947989	+	Missense_Mutation	SNP	C	C	T	c.1735G>A	c.(1735-1737)Gtg>Atg	p.V579M
19	17948833	1		0	0	0	0	820	182	0.181637	MDA-MB-468	JAK3	3718	hg19	19	17948833	17948833	+	Missense_Mutation	SNP	G	G	A	c.1609C>T	c.(1609-1611)Cgg>Tgg	p.R537W
19	17952198	1		0	0	0	0	260	123	0.321149	SW620	JAK3	3718	hg19	19	17952198	17952198	+	Splice_Site	SNP	G	G	A	c.1142C>T	c.(1141-1143)aCt>aTt	p.T381I
19	17953217	1		0	0	0	0	142	51	0.264249	KM-12	JAK3	3718	hg19	19	17953217	17953217	+	Missense_Mutation	SNP	C	C	T	c.769G>A	c.(769-771)Ggc>Agc	p.G257S
19	18266990	1		0	0	0	1	83	58	0.411348	HCT15	PIK3R2	5296	hg19	19	18266990	18266990	+	Missense_Mutation	SNP	C	C	T	c.301C>T	c.(301-303)Cgt>Tgt	p.R101C
19	18278061	1		1	1	1	1	0	1047	1	LOXIMVI	PIK3R2	5296	hg19	19	18278061	18278061	+	Missense_Mutation	SNP	A	A	G	c.1681A>G	c.(1681-1683)Aac>Gac	p.N561D
19	30308110	1		0	1	1	1	1009	442	0.304618	NCI-H23	CCNE1	898	hg19	19	30308110	30308110	+	Missense_Mutation	SNP	G	G	A	c.247G>A	c.(247-249)Gat>Aat	p.D83N
19	30312976	1		0	0	0	0	498	492	0.49697	HCT15	CCNE1	898	hg19	19	30312976	30312976	+	Missense_Mutation	SNP	A	A	T	c.779A>T	c.(778-780)aAt>aTt	p.N260I
19	33792732	1		0	0	0	0	10	12	0.545455	MDA-MB-231	CEBPA	1050	hg19	19	33792732	33792732	+	In_Frame_Ins	INS	-	-	GCGGGT	c.589_589insACCCGC	c.(589-591)ccg>ACCCGCccg	p.196_197insTR
19	33793253	1		0	0	0	0	135	17	0.111842	KM-12	CEBPA	1050	hg19	19	33793253	33793253	+	Frame_Shift_Ins	INS	-	-	G	c.68_68insC	c.(67-69)ccgfs	p.P23fs
19	40748487	1		0	0	0	1	596	331	0.357066	DU145	AKT2	208	hg19	19	40748487	40748487	+	Missense_Mutation	SNP	G	G	A	c.395C>T	c.(394-396)aCg>aTg	p.T132M
19	41727077	1		1	0	0	0	1398	411	0.227197	HT29	AXL	558	hg19	19	41727077	41727077	+	Missense_Mutation	SNP	C	C	T	c.335C>T	c.(334-336)aCg>aTg	p.T112M
19	41743933	1		0	0	0	0	260	61	0.190031	COLO-205	AXL	558	hg19	19	41743933	41743933	+	Frame_Shift_Ins	INS	-	-	C	c.868_868insC	c.(868-870)cccfs	p.P290fs
19	41743933	1		0	0	0	0	430	107	0.199255	IGROV-1	AXL	558	hg19	19	41743933	41743933	+	Frame_Shift_Del	DEL	C	C	-	c.868delC	c.(868-870)cccfs	p.P291fs
19	41743941	1		1	1	1	1	3	291	0.989796	OVCAR-8	AXL	558	hg19	19	41743941	41743941	+	Missense_Mutation	SNP	T	T	A	c.876T>A	c.(874-876)caT>caA	p.H292Q
19	41744385	1		0	1	1	1	220	208	0.485981	HCT116	AXL	558	hg19	19	41744385	41744385	+	Frame_Shift_Del	DEL	C	C	-	c.1005delC	c.(1003-1005)ggcfs	p.G335fs
19	41744385	1		1	1	1	1	238	179	0.429257	KM-12	AXL	558	hg19	19	41744385	41744385	+	Frame_Shift_Del	DEL	C	C	-	c.1005delC	c.(1003-1005)ggcfs	p.G335fs
19	41754430	1		0	0	0	0	377	387	0.506545	NCI-H226	AXL	558	hg19	19	41754430	41754430	+	Missense_Mutation	SNP	G	G	A	c.1549G>A	c.(1549-1551)Ggc>Agc	p.G517S
19	41758310	1		1	1	1	1	475	472	0.498416	HCT116	AXL	558	hg19	19	41758310	41758310	+	Missense_Mutation	SNP	T	T	A	c.1766T>A	c.(1765-1767)aTg>aAg	p.M589K
19	41762398	1		1	1	1	1	687	662	0.490734	HCT15	AXL	558	hg19	19	41762398	41762398	+	Missense_Mutation	SNP	T	T	C	c.2078T>C	c.(2077-2079)cTc>cCc	p.L693P
19	45858977	1		1	1	1	1	378	344	0.476454	HCT15	ERCC2	2068	hg19	19	45858977	45858977	+	Missense_Mutation	SNP	G	G	T	c.1489C>A	c.(1489-1491)Cgt>Agt	p.R497S
19	57742627	1		0	0	0	1	129	134	0.509506	HCT116	AURKC	6795	hg19	19	57742627	57742627	+	Missense_Mutation	SNP	C	C	A	c.11C>A	c.(10-12)cCc>cAc	p.P4H
19	57742665	1		1	0	0	1	114	132	0.536585	HCT15	AURKC	6795	hg19	19	57742665	57742665	+	Missense_Mutation	SNP	G	G	T	c.49G>T	c.(49-51)Ggc>Tgc	p.G17C
20	36026165	1		0	0	0	1	308	192	0.384	KM-12	SRC	6714	hg19	20	36026165	36026165	+	Frame_Shift_Del	DEL	AG	AG	-	c.767delAG	c.(766-768)cagfs	p.Q256fs
20	54945572	1		1	1	1	0	376	338	0.473389	HCT15	AURKA	6790	hg19	20	54945572	54945572	+	Missense_Mutation	SNP	G	G	A	c.998C>T	c.(997-999)aCa>aTa	p.T333I
20	54963226	1		1	1	1	1	183	184	0.501362	HCT15	AURKA	6790	hg19	20	54963226	54963226	+	Missense_Mutation	SNP	A	A	G	c.28T>C	c.(28-30)Tca>Cca	p.S10P
20	57428448	1		1	0	0	1	425	434	0.505239	HCT15	GNAS	2778	hg19	20	57428448	57428448	+	Missense_Mutation	SNP	C	C	A	c.128C>A	c.(127-129)cCt>cAt	p.P43H
20	57428604	1		1	0	0	1	852	594	0.410788	COLO-205	GNAS	2778	hg19	20	57428604	57428604	+	Missense_Mutation	SNP	G	G	T	c.284G>T	c.(283-285)aGc>aTc	p.S95I
20	57428645	1		1	1	1	1	396	209	0.345455	DU145	GNAS	2778	hg19	20	57428645	57428645	+	Missense_Mutation	SNP	C	C	T	c.325C>T	c.(325-327)Ccc>Tcc	p.P109S
20	57428948	1		0	0	0	0	496	194	0.281159	OVCAR-8	GNAS	2778	hg19	20	57428948	57428948	+	Missense_Mutation	SNP	G	G	C	c.628G>C	c.(628-630)Gct>Cct	p.A210P
20	57429372	1		0	0	0	0	865	121	0.122718	MCF7	GNAS	2778	hg19	20	57429372	57429372	+	Missense_Mutation	SNP	G	G	A	c.1052G>A	c.(1051-1053)aGa>aAa	p.R351K
20	57429652	1		0	0	0	0	285	44	0.133739	KM-12	GNAS	2778	hg19	20	57429652	57429652	+	Missense_Mutation	SNP	G	G	A	c.1142G>A	c.(1141-1143)gGg>gAg	p.G381E
20	57429700	1		0	0	0	0	75	101	0.573864	COLO-205	GNAS	2778	hg19	20	57429700	57429700	+	Missense_Mutation	SNP	C	C	T	c.1190C>T	c.(1189-1191)aCg>aTg	p.T397M
20	57429959	1		0	1	1	1	168	296	0.637931	DU145	GNAS	2778	hg19	20	57429959	57429959	+	Missense_Mutation	SNP	C	C	A	c.1639C>A	c.(1639-1641)Cgc>Agc	p.R547S
20	57484421	1		1	1	1	1	828	394	0.322422	KM-12	GNAS	2778	hg19	20	57484421	57484421	+	Missense_Mutation	SNP	G	G	A	c.602G>A	c.(601-603)cGt>cAt	p.R201H
20	57484834	1		0	0	0	0	1762	555	0.239534	MCF7	GNAS	2778	hg19	20	57484834	57484834	+	Missense_Mutation	SNP	C	C	G	c.814C>G	c.(814-816)Ctc>Gtc	p.L272V
20	57485119	1		1	1	1	1	470	475	0.502646	HCT116	GNAS	2778	hg19	20	57485119	57485119	+	Missense_Mutation	SNP	A	A	G	c.953A>G	c.(952-954)tAc>tGc	p.Y318C
20	57485432	1		1	1	1	1	406	394	0.4925	HCT15	GNAS	2778	hg19	20	57485432	57485432	+	Missense_Mutation	SNP	G	G	T	c.1014G>T	c.(1012-1014)aaG>aaT	p.K338N
21	36164547	1		0	0	0	0	158	22	0.122222	HCT15	RUNX1	861	hg19	21	36164547	36164547	+	Missense_Mutation	SNP	T	T	C	c.1247A>G	c.(1246-1248)aAc>aGc	p.N416S
21	36164547	1		0	0	0	0	112	16	0.125	SK-OV-3	RUNX1	861	hg19	21	36164547	36164547	+	Missense_Mutation	SNP	T	T	C	c.1247A>G	c.(1246-1248)aAc>aGc	p.N416S
21	36164820	1		0	0	0	0	384	220	0.364238	KM-12	RUNX1	861	hg19	21	36164820	36164820	+	Missense_Mutation	SNP	G	G	A	c.974C>T	c.(973-975)gCc>gTc	p.A325V
21	36206711	1		0	1	1	1	71	60	0.458015	HCT116	RUNX1	861	hg19	21	36206711	36206711	+	Missense_Mutation	SNP	C	C	T	c.720G>A	c.(718-720)atG>atA	p.M240I
21	36259345	1		0	0	0	1	158	185	0.539359	HCT116	RUNX1	861	hg19	21	36259345	36259345	+	Missense_Mutation	SNP	G	G	A	c.65C>T	c.(64-66)cCa>cTa	p.P22L
21	39774536	1		0	0	0	1	367	94	0.203905	DU145	ERG	2078	hg19	21	39774536	39774536	+	Missense_Mutation	SNP	C	C	T	c.637G>A	c.(637-639)Gat>Aat	p.D213N
21	42860441	1		0	1	1	1	842	311	0.269731	DU145	TMPRSS2	7113	hg19	21	42860441	42860441	+	Splice_Site	SNP	C	C	T		c.e5-1
21	42866439	1		0	0	0	0	0	654	1	OVCAR-8	TMPRSS2	7113	hg19	21	42866439	42866439	+	Missense_Mutation	SNP	C	C	T	c.82G>A	c.(82-84)Gca>Aca	p.A28T
21	42866441	1		1	1	1	1	541	469	0.464356	A498	TMPRSS2	7113	hg19	21	42866441	42866441	+	Missense_Mutation	SNP	G	G	A	c.80C>T	c.(79-81)cCc>cTc	p.P27L
22	21288108	1		1	0	0	1	350	389	0.526387	NCI-H23	CRKL	1399	hg19	22	21288108	21288108	+	Missense_Mutation	SNP	T	T	G	c.353T>G	c.(352-354)cTg>cGg	p.L118R
22	29092920	1		1	1	1	1	383	290	0.430906	HCT116	CHEK2	11200	hg19	22	29092920	29092920	+	Missense_Mutation	SNP	A	A	G	c.1064T>C	c.(1063-1065)cTg>cCg	p.L355P
22	29107949	1		1	1	1	1	516	531	0.507163	HCT15	CHEK2	11200	hg19	22	29107949	29107949	+	Missense_Mutation	SNP	G	G	T	c.740C>A	c.(739-741)gCc>gAc	p.A247D
22	29121016	1		0	1	1	0	915	247	0.212565	OVCAR-4	CHEK2	11200	hg19	22	29121016	29121016	+	Missense_Mutation	SNP	G	G	A	c.541C>T	c.(541-543)Cgt>Tgt	p.R181C
22	29121242	1		1	1	1	1	560	567	0.503106	HCT15	CHEK2	11200	hg19	22	29121242	29121242	+	Missense_Mutation	SNP	G	G	A	c.433C>T	c.(433-435)Cgg>Tgg	p.R145W
22	29121349	1		1	1	1	1	562	462	0.451172	KM-12	CHEK2	11200	hg19	22	29121349	29121349	+	Missense_Mutation	SNP	A	A	G	c.326T>C	c.(325-327)gTg>gCg	p.V109A
22	29682953	1		1	1	1	1	951	120	0.112045	HCT15	EWSR1	2130	hg19	22	29682953	29682953	+	Missense_Mutation	SNP	A	A	G	c.623A>G	c.(622-624)tAc>tGc	p.Y208C
22	30032794	1		0	1	1	1	8	802	0.990123	ACHN	NF2	4771	hg19	22	30032794	30032794	+	Nonsense_Mutation	SNP	C	C	T	c.169C>T	c.(169-171)Cga>Tga	p.R57*
22	30057209	1		1	1	1	1	2	737	0.997294	MDA-MB-231	NF2	4771	hg19	22	30057209	30057209	+	Nonsense_Mutation	SNP	G	G	T	c.691G>T	c.(691-693)Gag>Tag	p.E231*
22	30069309	1		0	1	1	1	0	159	1	DU145	NF2	4771	hg19	22	30069309	30069309	+	Frame_Shift_Del	DEL	GAG	GAG	-	c.1174delGAG	c.(1174-1176)gagfs	p.E394fs
22	39621819	1		0	0	0	0	297	466	0.610747	MCF7	PDGFB	5155	hg19	22	39621819	39621819	+	Missense_Mutation	SNP	G	G	A	c.635C>T	c.(634-636)aCg>aTg	p.T212M
22	39627748	1		1	0	0	1	154	182	0.541667	HCT116	PDGFB	5155	hg19	22	39627748	39627748	+	Missense_Mutation	SNP	T	T	A	c.335A>T	c.(334-336)gAc>gTc	p.D112V
X	47426094	1		0	0	0	1	143	81	0.361607	IGROV-1	ARAF	369	hg19	X	47426094	47426094	+	Frame_Shift_Del	DEL	C	C	-	c.614delC	c.(613-615)gccfs	p.A205fs
X	47426415	1		0	0	0	1	301	40	0.117302	HCT116	ARAF	369	hg19	X	47426415	47426415	+	Frame_Shift_Del	DEL	C	C	-	c.758delC	c.(757-759)accfs	p.T253fs
X	47426714	1		0	0	0	0	747	279	0.27193	IGROV-1	ARAF	369	hg19	X	47426714	47426714	+	Missense_Mutation	SNP	C	C	T	c.959C>T	c.(958-960)tCg>tTg	p.S320L
X	66765149	1		0	0	0	0	47	6	0.113208	KM-12	AR	367	hg19	X	66765149	66765149	+	In_Frame_Ins	INS	-	-	TGCTGC	c.161_161insTGCTGC	c.(160-162)ttg>tTGCTGCtg	p.54_54L>LLL
X	66765227	1		0	0	0	0	28	4	0.125	UACC62	AR	367	hg19	X	66765227	66765227	+	Frame_Shift_Del	DEL	AAGAGA	AAGAGA	-	c.239delAAGAGA	c.(238-240)caafs	p.Q80fs
X	66765234	1		0	0	0	0	31	4	0.114286	UACC62	AR	367	hg19	X	66765234	66765234	+	Frame_Shift_Del	DEL	TAGCCCCAG	TAGCCCCAG	-	c.246delTAGCCCCAG	c.(244-246)actfs	p.T82fs
X	66766187	1		1	0	0	1	378	137	0.266019	IGROV-1	AR	367	hg19	X	66766187	66766187	+	Missense_Mutation	SNP	C	C	T	c.1199C>T	c.(1198-1200)gCg>gTg	p.A400V
X	66905875	1		0	0	0	0	0	882	1	786-O	AR	367	hg19	X	66905875	66905875	+	Missense_Mutation	SNP	A	A	G	c.1792A>G	c.(1792-1794)Agc>Ggc	p.S598G
1	11269409	0	1	1	1	1	1				KM-12	MTOR	2475	hg19	1	11269409	11269409	+	Missense_Mutation	SNP	G		A	c.3761C>T	c.(3760-3762)CCC>CTC	p.P1254L
1	120458899	0	0	1	1	1	1				KM-12	NOTCH2	4853	hg19	1	120458899	120458899	+	Missense_Mutation	SNP	G		A	c.6446C>T	c.(6445-6447)TCC>TTC	p.S2149F
1	162748373	0	1	1	1	1	1				HCT15	DDR2	4921	hg19	1	162748373	162748373	+	Missense_Mutation	SNP	A		G	c.2287A>G	c.(2287-2289)AAG>GAG	p.K763E
2	47641538	0	0	1	0	1	1				KM-12	MSH2	4436	hg19	2	47641538	47641538	+	Missense_Mutation	SNP	G		A	c.923G>A	c.(922-924)AGA>AAA	p.R308K
3	52437626	0	1	1	0	0	1				CALU6	BAP1	8314	hg19	3	52437626	52437626	+	Missense_Mutation	SNP	C		A	c.1535G>T	c.(1534-1536)CGC>CTC	p.R512L
3	138453591	0	1	1	0	0	1				HCT15	PIK3CB	5291	hg19	3	138453591	138453591	+	Missense_Mutation	SNP	C		T	c.857G>A	c.(856-858)TGC>TAC	c.857G>A
3	142217605	0	1	1	1	1	1				HCT15	ATR	545	hg19	3	142217605	142217605	+	Missense_Mutation	SNP	T		C	c.5392A>G	c.(5392-5394)ACA>GCA	p.T1798A
5	80149962	0	0	1	0	0	0				IGROV-1	MSH3	4437	hg19	5	80149962	80149962	+	Missense_Mutation	SNP	G		A	c.2827G>A	c.(2827-2829)GAC>AAC	p.D943N
5	98192165	0	0	1	0	0	0				HT29	CHD1	1105	hg19	5	98192165	98192167	+	In_Frame_Del	DEL	AGG		-	c.5050_5052delCCT	c.(5050-5052)CCTdel	p.P1684del
5	112178939	0	1	1	1	1	1				HCT15	APC	324	hg19	5	112178939	112178939	+	Missense_Mutation	SNP	G		C	c.7648G>C	c.(7648-7650)GAG>CAG	p.E2550Q
5	131953817	0	0	1	1	1	1				KM-12	RAD50	10111	hg19	5	131953817	131953817	+	Missense_Mutation	SNP	G		T	c.3220G>T	c.(3220-3222)GCA>TCA	p.A1074S
6	30865939	0	1	1	0	0	1				HCT15	DDR1	780	hg19	6	30865939	30865939	+	Missense_Mutation	SNP	C		T	c.2324C>T	c.(2323-2325)ACG>ATG	p.T775M
7	13975475	0	0	1	0	0	1				KM-12	ETV1	2115	hg19	7	13975475	13975475	+	Missense_Mutation	SNP	G		A	c.412C>T	c.(412-414)CCC>TCC	p.P138S
7	140434564	0	0	1	1	1	1				KM-12	BRAF	673	hg19	7	140434564	140434564	+	Missense_Mutation	SNP	C		T	c.2134G>A	c.(2134-2136)GCC>ACC	p.A712T
8	38279368	0	0	1	0	1	1				HCT116	FGFR1	2260	hg19	8	38279368	38279368	+	Missense_Mutation	SNP	G		A	c.1028C>T	c.(1027-1029)GCG>GTG	p.A343V
9	98224209	0	0	1	1	1	1				KM-12	PTCH1	5727	hg19	9	98224209	98224209	+	Missense_Mutation	SNP	C		T	c.2632G>A	c.(2632-2634)GAC>AAC	p.D878N
10	123247566	0	0	1	0	0	1				A498	FGFR2	2263	hg19	10	123247566	123247566	+	Missense_Mutation	SNP	A		G	c.1928T>C	c.(1927-1929)ATA>ACA	p.I643T
10	123353307	0	0	1	0	0	1				A498	FGFR2	2263	hg19	10	123353307	123353307	+	Missense_Mutation	SNP	A		T	c.25T>A	c.(25-27)TGC>AGC	p.C9S
12	69222611	0	0	1	0	0	1				786-O	MDM2	4193	hg19	12	69222611	69222611	+	Missense_Mutation	SNP	T		C	c.584T>C	c.(583-585)ATT>ACT	p.I195T
13	32937542	0	0	1	0	0	1				UACC257	BRCA2	675	hg19	13	32937542	32937542	+	Missense_Mutation	SNP	C		T	c.8203C>T	c.(8203-8205)CCC>TCC	p.P2735S
14	36987078	0	1	1	0	0	1				IGROV-1	NKX2-1	7080	hg19	14	36987078	36987078	+	Missense_Mutation	SNP	T		C	c.611A>G	c.(610-612)TAC>TGC	p.Y204C
15	99500303	0	1	1	1	1	1				HCT15	IGF1R	3480	hg19	15	99500303	99500303	+	Missense_Mutation	SNP	C		T	c.3736C>T	c.(3736-3738)CGC>TGC	p.R1246C
17	7577539	0	0	1	0	0	1				786-O	TP53	7157	hg19	17	7577539	7577539	+	Missense_Mutation	SNP	G		A	c.742C>T	c.(742-744)CGG>TGG	p.R248W
17	12044530	0	1	1	1	1	1				HCT15	MAP2K4	6416	hg19	17	12044530	12044530	+	Missense_Mutation	SNP	C		A	c.1186C>A	c.(1186-1188)CTG>ATG	p.L396M
17	29557385	0	0	1	0	0	0				MDA-MB-468	NF1	4763	hg19	17	29557385	29557385	+	Missense_Mutation	SNP	A		G	c.3098A>G	c.(3097-3099)CAA>CGA	p.Q1033R
17	37866384	0	1	1	1	1	1				KM-12	ERBB2	2064	hg19	17	37866384	37866384	+	Missense_Mutation	SNP	C		T	c.689C>T	c.(688-690)CCA>CTA	p.P230L
19	17942128	0	1	1	1	1	1				HCT15	JAK3	3718	hg19	19	17942128	17942128	+	Missense_Mutation	SNP	C		T	c.2887G>A	c.(2887-2889)GTC>ATC	p.V963I
19	41762429	0	0	1	0	0	0				SF-295	AXL	558	hg19	19	41762429	41762429	+	Nonsense_Mutation	SNP	C		A	c.2109C>A	c.(2107-2109)TAC>TAA	p.Y703*
20	57430050	0	0	1	1	1	1				KM-12	GNAS	2778	hg19	20	57430050	57430050	+	Missense_Mutation	SNP	G		A	c.1730G>A	c.(1729-1731)AGC>AAC	p.S577N
22	30069309	0	1	1	0	1	1				IGROV-1	NF2	4771	hg19	22	30069309	30069309	+	Missense_Mutation	SNP	G		A	c.1174G>A	c.(1174-1176)GAG>AAG	p.E392K
1	9782032	0	0	0	1	1	1				HCT15	PIK3CD			1	9782032			Splice_Site	DEL	G		-	c.2056-1delg	c.e17-1
1	43805657	0	0	0	1	1	1				KM-12	MPL			1	43805657			Missense_Mutation	SNP	G		A	c.713G>A	c.(712-714)gGt>gAt	p.G238D
1	65316595	0	0	0	1	1	1				CALU6	JAK1			1	65316595			Splice_Site	SNP	T		A	c.1649-2A>T	c.e12-2
1	120468105	0	1	0	1	1	1				KM-12	NOTCH2			1	120468105			Missense_Mutation	SNP	C		T	c.4334G>A	c.(4333-4335)aGc>aAc	p.S1445N
2	29430083	0	0	0	1	1	1				KM-12	ALK			2	29430083			Missense_Mutation	SNP	G		A	c.3892C>T	c.(3892-3894)Cca>Tca	p.P1298S
3	37089035	0	0	0	1	1	1				IGROV-1	MLH1			3	37089035			Missense_Mutation	SNP	C		T	c.1757C>T	c.(1756-1758)gCc>gTc	p.A586V
4	1805482	0	1	0	1	1	1				KM-12	FGFR3			4	1805482			Missense_Mutation	SNP	G		A	c.994G>A	c.(994-996)Gag>Aag	p.E332K
4	106155784	0	0	0	1	0	0				DU145	TET2			4	106155784			frameshift	INS				c.685_686insA		p.T229fs*25
4	153273765	0	0	0	1	0	0				DU145	FBXW7			4	153273765			Nonsense_Mutation	SNP				c.118G>T		p.E40*
5	112175099	0	1	0	1	1	1				A498	APC			5	112175099			Missense_Mutation	SNP	T		C	c.3808T>C	c.(3808-3810)Tgt>Cgt	p.C1270R
5	112175957	0	0	0	1	0	0				HT29	APC			5	112175957			frameshift	INS				c.4666_4667insA		p.T1556fs*3
7	140482933	0	0	0	1	0	0				KM-12	BRAF			7	140482933			frameshift	INS				c.1201_1202insC		p.A404fs*9
9	98279006	0	1	0	1	1	1				Hs-578-T	PTCH1			9	98279006			Missense_Mutation	SNP	A		C	c.97T>G	c.(97-99)Ttc>Gtc	p.F33V
9	136918536	0	0	0	1	0	0				HCT116	BRD3			9	136918536			frameshift	INS				c.63_64insC		p.E25fs*51
11	108142070	0	0	0	1	1	1				MDA-MB-231	ATM			11	108142070			Missense_Mutation	SNP	A		T	c.3014A>T	c.(3013-3015)aAt>aTt	p.N1005I
13	32911387	0	0	0	1	1	1				MDA-MB-468	BRCA2			13	32911387			Missense_Mutation	SNP	G		C	c.2895G>C	c.(2893-2895)atG>atC	p.M965I
13	32914118	0	0	0	1	1	1				CALU6	BRCA2			13	32914118			Missense_Mutation	SNP	G		A	c.5626G>A	c.(5626-5628)Gaa>Aaa	p.E1876K
13	32930643	0	0	0	1	1	1				OVCAR-4	BRCA2			13	32930643			Missense_Mutation	SNP	C		T	c.7514C>T	c.(7513-7515)cCa>cTa	p.P2505L
15	88524574	0	0	0	1	0	0				HCT15	NTRK3			15	88524574			Missense_Mutation	SNP				c.1603G>A		p.D535N
17	29553478	0	0	0	1	1	1				HCT116	NF1			17	29553478			frameshift	DEL	C		-	c.2027delC	c.(2026-2028)accfs	p.T676fs
17	29553484	0	0	0	1	0	0				KM-12	NF1			17	29553484			frameshift	INS				c.2033_2034insCC		p.I679fs*10
17	38561126	0	0	0	1	0	0				HCT116	TOP2A			17	38561126			frameshift	INS				c.1962_1963insA		p.Q657fs*4
17	41223196	0	1	0	1	1	1				KM-12	BRCA1			17	41223196			Missense_Mutation	SNP	G		A	c.4735C>T	c.(4735-4737)Cct>Tct	p.P1579S
19	15379780	0	1	0	1	1	1				KM-12	BRD4			19	15379780			Nonsense_Mutation	SNP	C		T	c.359G>A	c.(358-360)tGg>tAg	p.W120*
20	57429261	0	0	0	1	1	1				KM-12	GNAS			20	57429261			Missense_Mutation	SNP	C		T	c.941C>T	c.(940-942)gCc>gTc	p.A314V
