# Supplementary material for: False-negative errors in next-generation sequencing contribute substantially to inconsistency of mutation databases
Source: PLoS One. 2019 Sep 12;14(9):e0222535. doi: 10.1371/journal.pone.0222535 (PMC6742382; doi:10.1371/journal.pone.0222535)
Supplement: S7 Table — (XLSX) [file pone.0222535.s007.xlsx]

## Sheet: Sheet1
S7 Table. P-FN mutations which were confirmed from the GDSC or updated CCLE databases or by Sanger sequencing
confirmation method*	chromosome	position	GDSC	nGDSC**	CCLE	nCCLE***	Cell line	Gene	Mutation type 1	Mutation type 2	Ref	Allele1	Allele2	cDNA change	cDNA	AA change
Sanger Sequencing	2	29416133	0	0	0	0	SW620	ALK	Missense_Mutation	SNP	G	G	A	c.4820C>T	c.(4819-4821)aCc>aTc	p.T1607I
Sanger Sequencing	2	29448419	0	0	0	0	A498	ALK	Missense_Mutation	SNP	G	G	A	c.3080C>T	c.(3079-3081)cCg>cTg	p.P1027L
Sanger Sequencing	2	30143246	0	0	0	0	KM-12	ALK	Missense_Mutation	SNP	C	C	T	c.280G>A	c.(280-282)Gac>Aac	p.D94N
Sanger Sequencing	6	32163225	0	0	0	0	HCT15	NOTCH4	Missense_Mutation	SNP	C	C	A	c.6001G>T	c.(6001-6003)Ggt>Tgt	p.G2001C
Sanger Sequencing	6	32165284	0	0	0	0	SW620	NOTCH4	Missense_Mutation	SNP	G	G	A	c.4844C>T	c.(4843-4845)cCc>cTc	p.P1615L
Sanger Sequencing	6	32180684	0	0	0	0	A549	NOTCH4	Missense_Mutation	SNP	A	A	C	c.2443T>G	c.(2443-2445)Tgt>Ggt	p.C815G
Sanger Sequencing	9	98209617	0	0	0	0	IGROV-1	PTCH1	Frame_Shift_Del	DEL	G	G	-	c.3921delC	c.(3919-3921)cccfs	p.P1307fs
Sanger Sequencing	9	98209693	0	0	0	0	MDA-MB-468	PTCH1	Missense_Mutation	SNP	G	G	A	c.3845C>T	c.(3844-3846)cCg>cTg	p.P1282L
Sanger Sequencing	9	98211547	0	0	0	0	HCT15	PTCH1	Missense_Mutation	SNP	C	C	T	c.3608G>A	c.(3607-3609)aGc>aAc	p.S1203N
Sanger Sequencing	9	98244480	0	0	0	0	HCT15	PTCH1	Missense_Mutation	SNP	C	C	A	c.590G>T	c.(589-591)tGg>tTg	p.W197L
Sanger Sequencing	9	98278972	0	0	0	0	MDA-MB-468	PTCH1	Missense_Mutation	SNP	T	T	C	c.131A>G	c.(130-132)gAa>gGa	p.E44G
Sanger Sequencing	9	133755543	0	0	0	0	SK-OV-3	ABL1	Splice_Site	SNP	C	C	T	c.1512C>T	c.(1510-1512)gaC>gaT	p.D504D
Sanger Sequencing	9	133760106	0	0	0	0	HT29	ABL1	Missense_Mutation	SNP	C	C	T	c.2429C>T	c.(2428-2430)cCg>cTg	p.P810L
Sanger Sequencing	12	12022496	0	0	0	0	NCI-H522	ETV6	Missense_Mutation	SNP	T	T	C	c.602T>C	c.(601-603)cTc>cCc	p.L201P
Sanger Sequencing	12	12022555	0	0	0	0	HCT15	ETV6	Missense_Mutation	SNP	C	C	T	c.661C>T	c.(661-663)Ccc>Tcc	p.P221S
Sanger Sequencing	19	1221948	0	0	0	0	KM-12	STK11	Splice_Site	SNP	G	G	A	c.863G>A	c.(862-864)gGg>gAg	p.G288E
Sanger Sequencing	19	15353819	0	0	0	0	DU145	BRD4	Frame_Shift_Del	DEL	G	G	-	c.3061delC	c.(3061-3063)catfs	p.H1021fs
Sanger Sequencing	19	15354250	0	0	0	0	IGROV-1	BRD4	Missense_Mutation	SNP	G	G	A	c.2630C>T	c.(2629-2631)gCc>gTc	p.A877V
Sanger Sequencing	21	36164547	0	0	0	0	HCT15	RUNX1	Missense_Mutation	SNP	T	T	C	c.1247A>G	c.(1246-1248)aAc>aGc	p.N416S
Sanger Sequencing	21	36164547	0	0	0	0	SK-OV-3	RUNX1	Missense_Mutation	SNP	T	T	C	c.1247A>G	c.(1246-1248)aAc>aGc	p.N416S
Sanger Sequencing	21	36164820	0	0	0	0	KM-12	RUNX1	Missense_Mutation	SNP	G	G	A	c.974C>T	c.(973-975)gCc>gTc	p.A325V
Sanger Sequencing	X	66765149	0	0	0	0	KM-12	AR	In_Frame_Ins	INS	-	-	TGCTGC	c.161_161insTGCTGC	c.(160-162)ttg>tTGCTGCtg	p.54_54L>LLL
Sanger Sequencing	X	66765227	0	0	0	0	UACC62	AR	Frame_Shift_Del	DEL	AAGAGA	AAGAGA	-	c.239delAAGAGA	c.(238-240)caafs	p.Q80fs
Sanger Sequencing	X	66765234	0	0	0	0	UACC62	AR	Frame_Shift_Del	DEL	TAGCCCCAG	TAGCCCCAG	-	c.246delTAGCCCCAG	c.(244-246)actfs	p.T82fs
Sanger Sequencing	X	66905875	0	0	0	0	786-O	AR	Missense_Mutation	SNP	A	A	G	c.1792A>G	c.(1792-1794)Agc>Ggc	p.S598G
databases	2	29455188	1	1	1	1	A498	ALK	Missense_Mutation	SNP	C	C	T	c.2614G>A	c.(2614-2616)Ggc>Agc	p.G872S
databases	2	29541220	1	1	0	1	HCT15	ALK	Missense_Mutation	SNP	T	T	C	c.1597A>G	c.(1597-1599)Aca>Gca	p.T533A
databases	6	32168893	1	1	0	1	MDA-MB-231	NOTCH4	Splice_Site	SNP	C	C	A		c.e22+1
databases	6	32171633	0	0	0	1	NCI-H23	NOTCH4	Missense_Mutation	SNP	G	G	T	c.3145C>A	c.(3145-3147)Ccc>Acc	p.P1049T
databases	9	21971108	1	1	0	1	DU145	CDKN2A	Missense_Mutation	SNP	C	C	A	c.250G>T	c.(250-252)Gac>Tac	p.D84Y
databases	9	21971116	1	1	0	1	UACC257	CDKN2A	Missense_Mutation	SNP	G	G	A	c.242C>T	c.(241-243)cCc>cTc	p.P81L
databases	9	21974759	0	0	0	1	HCT116	CDKN2A	Frame_Shift_Ins	INS	-	-	C	c.68_68insG	c.(67-69)ggtfs	p.G23fs
databases	9	21994234	0	0	0	1	HCT116	CDKN2A	Frame_Shift_Del	DEL	C	C	-	c.97delG	c.(97-99)gagfs	p.E33fs
databases	9	21994393	0	0	1	1	OVCAR-4	CDKN2A	Missense_Mutation	SNP	A	A	T	c.61T>A	c.(61-63)Tca>Aca	p.S21T
databases	9	98209617	1	1	0	1	KM-12	PTCH1	Frame_Shift_Del	DEL	G	G	-	c.3921delC	c.(3919-3921)cccfs	p.P1307fs
databases	9	98278959	0	0	1	1	RPMI-8226	PTCH1	In_Frame_Ins	INS	-	-	TTC	c.144_144insGAA	c.(142-144)gaa>gaGAAa	p.48_49insK
databases	9	98278975	1	1	0	1	HCT15	PTCH1	Missense_Mutation	SNP	C	C	T	c.128G>A	c.(127-129)gGa>gAa	p.G43E
databases	9	133738370	1	1	0	1	HCT116	ABL1	Missense_Mutation	SNP	A	A	G	c.770A>G	c.(769-771)tAc>tGc	p.Y257C
databases	9	133760024	0	1	1	1	IGROV-1	ABL1	Frame_Shift_Del	DEL	C	C	-	c.2347delC	c.(2347-2349)cccfs	p.P784fs
databases	9	133760528	1	1	0	1	UACC257	ABL1	Missense_Mutation	SNP	C	C	T	c.2851C>T	c.(2851-2853)Ccg>Tcg	p.P951S
databases	9	133760529	1	1	0	1	UACC257	ABL1	Missense_Mutation	SNP	C	C	T	c.2852C>T	c.(2851-2853)cCg>cTg	p.P951L
databases	12	11905427	1	1	0	0	HCT15	ETV6	Missense_Mutation	SNP	G	G	C	c.77G>C	c.(76-78)aGt>aCt	p.S26T
databases	12	12022670	1	1	0	1	DU145	ETV6	Missense_Mutation	SNP	G	G	T	c.776G>T	c.(775-777)cGg>cTg	p.R259L
databases	19	1207021	1	1	0	1	A549	STK11	Nonsense_Mutation	SNP	C	C	T	c.109C>T	c.(109-111)Cag>Tag	p.Q37*
databases	19	1207021	1	1	0	1	NCI-H460	STK11	Nonsense_Mutation	SNP	C	C	T	c.109C>T	c.(109-111)Cag>Tag	p.Q37*
databases	19	1220438	1	1	0	1	DU145	STK11	Frame_Shift_Del	DEL	CAAGC	CAAGC	-	c.531delCAAGC	c.(529-531)atcfs	p.I177fs
databases	19	1223059	1	1	1	1	NCI-H23	STK11	Nonsense_Mutation	SNP	G	G	A	c.996G>A	c.(994-996)tgG>tgA	p.W332*
databases	19	12038893	1	1	1	1	HT29	ETV6	Missense_Mutation	SNP	A	A	G	c.1186A>G	c.(1186-1188)Aga>Gga	p.R396G
databases	19	15349558	0	0	0	1	HCT15	BRD4	Missense_Mutation	SNP	T	T	C	c.4016A>G	c.(4015-4017)gAa>gGa	p.E1339G
databases	19	15355374	0	0	0	1	HCT15	BRD4	Missense_Mutation	SNP	G	G	A	c.2249C>T	c.(2248-2250)cCg>cTg	p.P750L
databases	19	15367974	0	0	0	1	HCT15	BRD4	Missense_Mutation	SNP	T	T	C	c.1352A>G	c.(1351-1353)gAa>gGa	p.E451G
databases	21	36206711	1	1	0	1	HCT116	RUNX1	Missense_Mutation	SNP	C	C	T	c.720G>A	c.(718-720)atG>atA	p.M240I
databases	21	36259345	0	0	0	1	HCT116	RUNX1	Missense_Mutation	SNP	G	G	A	c.65C>T	c.(64-66)cCa>cTa	p.P22L
databases	X	66766187	0	0	1	1	IGROV-1	AR	Missense_Mutation	SNP	C	C	T	c.1199C>T	c.(1198-1200)gCg>gTg	p.A400V
*Confirmation method by Sanger sequencing or the reported databases
**mutations were marked (1) which were reported in the later version of GDSC
**mutations were marked (1) which were reported in the later version of CCLE
